# Supplementary material for: Genome-reconstruction for eukaryotes from complex natural microbial communities
Source: HighWire-hosted journal article supplement (doi:10.1101/gr.228429.117), 2018-03-01
Supplement: Supplemental_Legends.docx [file Supplemental_Legends.docx]

**Supplemental Figure S1 GC skew plot of the circularized and curated Saccharibacteria genome from CG_WC.** iRep (Brown et al. 2016) was used to predict the position of the origin and terminus as well as calculate and plot the GC skew across the genome. Predicted origin is represented by the red line and predicted terminus is represented by the blue line.

**Supplemental Figure S2 Prodigal gene prediction results in poor quality gene models for eukaryotic genomes.** (A-C) Prodigal predicted gene set as compared to the reference JGI annotation pipeline predicted gene set for the Mycosphaerella gramanicola genome. (A) Total number of predicted genes in each set. (B) Histogram of predicted gene lengths for both gene sets. Overlaid lines are kernel density estimate plots. (C) Comparison of for a given gene from one gene set, how many genes in the other gene set it overlaps. 99% of Prodigal predicted genes overlap either zero or one genes from the JGI predicted gene set. An overlap is defined as sharing any length of the same genomic region. (D-F) Prodigal predicted gene set compared to MAKER2 predicted gene set (using GeneMark-ES and AUGUSTUS gene predictors) for the WC_Fungi_A genome binned from the CG_WC sample. (G) BUSCO completeness estimates for protein sets derived from Prodigal, MAKER2 (using GeneMark-ES and AUGUSTUS gene predictors), and NCBI reference protein sets for the eukaryotic genomes listed in Figure 3A.

**Supplemental Figure S3 Effect of *k*-mer length and sequence length on prediction accuracy. (**A) Proportion of total sequence tested accurately recovered as either prokaryotic or eukaryotic for both eukaryotes (n=18) and prokaryotes (n=46) from phyla not represented in EukRep’s training set. (B) Proportion of total sequence tested accurately recovered as either prokaryotic or eukaryotic for both eukaryotes (n=18) and prokaryotes (n=46) with taxator-tk both with the genomes present in its reference set used for mapping or with the genomes removed from its reference set. (C) EukRep runtime on the CG_WC metagenome (874 Mbp in assembled length) on a single core utilizing *k*-mer lengths of 3-7bp.

**Supplemental Figure S4 Gene Prediction outcomes on the genome of *Choanephora cucurbitarum* spiked into a complex soil metagenome.** (A) Histogram of predicted gene lengths for Prodigal, MAKER2, and NCBI obtained reference protein sets. Overlaid lines are kernel density estimate plots. (B) Total number of predicted genes in each set.

**Supplemental Figure S5 Dendrograms of infant-derived fecal sample and thiocyanate reactor sample genomes based on Average Nucleotide Identity (ANI).** The compare_wf workflow of dRep (Olm et al. 2017) with default parameters was used to cluster highly similar genomes and calculate ANI. C. albicans and C. parapsilosis genomes were obtained from the Candida Genome Database (Skrzypek et al.). (A) Fungal genomes binned from infant fecal-derived samples. (B) Rotifer genomes binned from thiocyanate reactor samples.

**Supplemental Table S1 Genomes used for training the Linear-SVM classifier.** Each genome is listed, organized by the class it was used to train (such as bacteria), along with its genome size. Genomes were obtained from NCBI and JGI.

**Supplemental Table S2 Genomes used for testing the Linear-SVM classifier.** Each genome that was used for testing EukRep is listed along with its full genome size, the amount of the genome that was in contigs greater than 3kb, the amount of the genome that was classified as either eukaryotic or prokaryotic, and accuracy. Genomes were obtained from NCBI and JGI.

**Supplemental Table S3 Metabolism summary for binned genomes.**For each individual bin,the presence or absence of various metabolic pathways is summarized. Metabolic pathways included are taken from a custom set of metabolic pathway marker gene HMMs (Anantharaman et al. 2016), HMMs for CAZymes grouped by putative substrate class (Cantarel et al. 2009), lipase HMMs from the Lipase Engineering Database (Fischer and Pleiss 2003), and BLASTing against a protease database obtained from MEROPS (Rawlings et al. 2016). Predicted proteases and lipases were filtered to specifically identify putative excreted proteases and lipases by searching for proteins with secretion signals identified with SignalP (Petersen et al. 2011) and less than three transmembrane domains with TMHMM (Krogh et al, 2001).

**Supplemental Table S4 Wood-Degrading CAZyme profile for WC Fungi.** CAZyme profiles for fungi binned from CG_WC with a focus on enzymes putatively involved in wood-degradation.
