# Supplementary material for: Genome-reconstruction for eukaryotes from complex natural microbial communities
Source: HighWire-hosted journal article supplement (doi:10.1101/gr.228429.117), 2018-03-01
Supplement: Supplemental_Table_S2.xlsx [file Supplemental_Table_S2.xlsx]

## Sheet: Supplemental Table S2
Supplemental Table S2 Genomes used for testing the Linear-SVM classifier.
Each genome that was used for testing EukRep is listed along with its full genome size, the amount of the genome that was in contigs greater than 3kb, the amount of the genome that was classified as either eukaryotic or prokaryotic, and accuracy. Genomes were obtained from NCBI and JGI.
Organism	Lineage	Genome Size (bp)	bps tested (in contigs > 3kb)	Predicted Eukaryote (bp)	Predicted Prokaryote )bp)	Contig Count	Percent Accuracy
Prokaryotes
Candidatus Carsonella ruddii	Bacteria; Proteobacteria; Gammaproteobacteria; Oceanospirillales; Halomonadaceae; Zymobacter group; Candidatus Carsonella	157543	157543	157543	0	2	0
Candidatus Magasanikbacteria bacterium GW2011_GWC2_42_27 UV18_C0001	Bacteria; unclassified Bacteria; Bacteria candidate phyla; Patescibacteria group; Parcubacteria group	1137899	1137899	1112342	25557	20	2.24598
Nanohaloarchaea archaeon B1-Br10_U2g19	Archaea; DPANN group; Candidatus Nanohaloarchaeota; Nanohaloarchaea; unclassified Nanohaloarchaea	662884	662884	561427	101457	35	15.3054
CG_4_10_14_0_8_um_filter_cor_Magasanikbacteria_34_276	Bacteria; unclassified Bacteria; Bacteria candidate phyla; Patescibacteria group; Parcubacteria group	254042	198654	145803	52851	36	26.6045
CG_4_10_14_0_8_um_filter_cor_CG_Nomura_02_43_17		738568	690276	486143	204133	29	29.5727
Candidatus Blackburnbacteria bacterium RIFCSPHIGHO2_02_FULL_44_20	Bacteria; unclassified Bacteria; Bacteria candidate phyla; Patescibacteria group; Microgenomates group; Candidatus Blackburnbacteria	843579	843579	503889	339690	40	40.2677
Chlamydiae bacterium RIFCSPHIGHO2_12_FULL_49_9	Bacteria; PVC group; Chlamydiae	1320587	1320587	765371	555216	93	42.0431
CG_4_10_14_0_8_um_filter_cor_Collierbacteria_43_86	Bacteria; unclassified Bacteria; Bacteria candidate phyla; Patescibacteria group; Microgenomates group	864171	864171	474384	389787	64	45.1053
Bacteria CP GN02 candidate division GN02 bacterium JGI 0000069 K10 CrabSpa 001 277		759477	747608	390556	357052	60	47.7593
Bacteria Aminicenantes OP8 RBG 19FT COMBO Aminicenantes 58 17	Bacteria; unclassified Bacteria; Bacteria candidate phyla	3573970	3573970	1773171	1800799	292	50.3865
Candidatus Colwellbacteria bacterium RIFCSPHIGHO2_02_FULL_45_17	Bacteria; unclassified Bacteria; Bacteria candidate phyla; Patescibacteria group; Parcubacteria group; Candidatus Colwellbacteria	461877	461877	216660	245217	38	53.0914
Candidatus Collierbacteria bacterium GW2011_GWA1_45_15 UW96_C0001	Bacteria; unclassified Bacteria; Bacteria candidate phyla; Patescibacteria group; Parcubacteria group; Candidatus Colwellbacteria	856977	856977	396416	460561	22	53.7425
CG_4_10_14_0_8_um_filter_cor_CG_Micra_03_55_7		741814	551513	249968	301545	99	54.676
Bacteria Aminicenantes OP8 RBG 13 Aminicenantes 59 9	Bacteria; unclassified Bacteria; Bacteria candidate phyla	3309676	3309676	1268254	2041422	268	61.6804
Candidate division WS6 bacterium GW2011_GWC1_36_11 UR96_C0001	Bacteria; unclassified Bacteria; Bacteria candidate phyla	711267	711267	261032	450235	47	63.3004
Selenomonas sp. oral taxon 136 strain F0591	Bacteria; Terrabacteria group; Firmicutes; Negativicutes; Selenomonadales; Selenomonadaceae; Selenomonas; Selenomonas sp. oral taxon 136	2458072	2458072	900000	1558072	26	63.3859
Candidatus Woesearchaeota archaeon RBG_13_36_6	Archaea; DPANN group; Candidatus Woesearchaeota	689463	689463	229412	460051	63	66.726
Anaerococcus prevotii DSM 20548	Bacteria; Terrabacteria group; Firmicutes; Tissierellia; Tissierellales; Peptoniphilaceae; Anaerococcus; Anaerococcus prevotii	1883067	1883067	600000	1283067	19	68.1371
Candidatus Harrisonbacteria bacterium RIFCSPLOWO2_01_FULL_40_28	Bacteria; unclassified Bacteria; Bacteria candidate phyla; Patescibacteria group; Parcubacteria group; Candidatus Harrisonbacteria	2762031	2711138	740856	1970282	131	72.6736
Altiarchaeum hamiconexum	Archaea; Euryarchaeota; unclassified Euryarchaeota; Candidatus Altiarchaeales; Candidatus Altiarchaeum	4709015	4709015	1223693	3485322	465	74.0138
Bacteria_TM6_RIFCSPHIGHO2_12_FULL_TM6_38_8	Bacteria; unclassified Bacteria; unclassified Bacteria (miscellaneous)	665804	665804	157856	507948	58	76.2909
Streptococcus salivarius CCHSS3	Bacteria; Terrabacteria group; Firmicutes; Bacilli; Lactobacillales; Streptococcaceae; Streptococcus; Streptococcus salivarius	2217184	2217184	500000	1717184	23	77.4489
CG_4_10_14_0_8_um_filter_cor_CG_Pacebac_01_34_58	Bacteria; unclassified Bacteria; Bacteria candidate phyla; Patescibacteria group; Microgenomates group	944376	944376	206997	737379	55	78.0811
Dehalococcoidia bacterium SM23_28_1	Bacteria; Terrabacteria group; Chloroflexi; Dehalococcoidia; unclassified Dehalococcoidia	732023	732023	154536	577487	89	78.8892
CG23_combo_of_CG06-09_8_20_14_all_150_Altiarchaeum_hamiconexum		1223591	1223591	255185	968406	143	79.1446
Actinomyces urogenitalis	Bacteria; Terrabacteria group; Actinobacteria; Actinobacteria; Actinomycetales; Actinomycetaceae; Actinomyces	2600857	1420071	258151	1161920	284	81.8213
CG_4_10_14_0_8_um_filter_cor_CG_CPArch01_01_31_133		505858	454903	81862	373041	45	82.0045
Mycoplasma haemofelis str. Langford 1	Bacteria; Terrabacteria group; Tenericutes; Mollicutes; Mycoplasmatales; Mycoplasmataceae; Mycoplasma; Mycoplasma haemofelis	1147259	1147259	200000	947259	12	82.5671
Methanosphaera stadtmanae DSM 3091	Archaea; Euryarchaeota; Methanobacteria; Methanobacteriales; Methanobacteriaceae; Methanosphaera; Methanosphaera stadtmanae	1767403	1767403	300000	1467403	18	83.0259
CG_4_10_14_0_8_um_filter_cor_CG_Aenigma_01_37_24		866107	812656	137762	674894	68	83.0479
Thiovulum sp. ES	Bacteria; Proteobacteria; delta/epsilon subdivisions; Epsilonproteobacteria; Campylobacterales; Helicobacteraceae; Thiovulum	2080587	1977323	324402	1652921	107	83.5939
Candidatus Peregrinibacteria bacterium RIFCSPLOWO2_02_FULL_48_14	Bacteria; unclassified Bacteria; Bacteria candidate phyla; Candidatus Peregrinibacteria; unclassified Candidatus Peregrinibacteria	826567	826567	134840	691727	75	83.6867
Candidatus Abawacabacteria bacterium RBG_16_42_10	Bacteria; unclassified Bacteria; Bacteria candidate phyla; Candidatus Abawacabacteria	1095595	1095595	167663	927932	28	84.6966
Candidate division SR1 bacterium RAAC1_SR1_1	Bacteria; unclassified Bacteria; Bacteria candidate phyla; candidate division SR1	1177760	1177760	177760	1000000	12	84.9069
Candidate division WOR_3 bacterium SM1_77 WOR1_30_36_10180	Bacteria; unclassified Bacteria; Bacteria candidate phyla	1269144	1269144	189166	1079978	150	85.095
Candidatus Portiera aleyrodidarum BT-B	Bacteria; Proteobacteria; Gammaproteobacteria; Oceanospirillales; Halomonadaceae; Zymobacter group; whitefly endosymbionts; Candidatus Portiera; Candidatus Portiera aleyrodidarum	351658	351658	51658	300000	4	85.3102
Candidatus Gracilibacteria bacterium CG2_30_37_12	Bacteria; unclassified Bacteria; Bacteria candidate phyla; Patescibacteria group; Candidatus Gracilibacteria; unclassified Candidatus Gracilibacteria	462893	462893	65888	397005	69	85.766
Lokiarchaeum sp. GC14_75	Archaea; Asgard group; Candidatus Lokiarchaeota; Lokiarchaeum	5143417	4940345	699263	4241082	393	85.8459
Streptococcus suis D9	Bacteria; Terrabacteria group; Firmicutes; Bacilli; Lactobacillales; Streptococcaceae; Streptococcus; Streptococcus suis	2177656	2177656	300000	1877656	22	86.2237
Leptospira weilii	Bacteria; Spirochaetes; Spirochaetia; Leptospirales; Leptospiraceae; Leptospira	4323312	4323312	592670	3730642	83	86.2913
Alicyclobacillus acidocaldarius LAA1	Bacteria; Terrabacteria group; Firmicutes; Bacilli; Bacillales; Alicyclobacillaceae; Alicyclobacillus; Alicyclobacillus acidocaldarius	5886568	5878378	805450	5072928	112	86.2981
Candidate division TM6 bacterium GW2011_GWF2_30_66 UR12_C0001	Bacteria; unclassified Bacteria; Bacteria candidate phyla; Candidatus Dependentiae	1113702	1113702	143244	970458	53	87.138
Euryarchaeota archaeon RBG_13_31_8	Archaea; Euryarchaeota; unclassified Euryarchaeota; unclassified Euryarchaeota (miscellaneous)	1562518	1560320	178453	1381867	145	88.5631
Candidate divison MSBL1 archaeon SCGC-AAA259A05	Archaea; Euryarchaeota; unclassified Euryarchaeota; candidate division MSBL1	1161635	1061723	120928	940795	117	88.6102
Thermoplasmatales archaeon SCGC AB-539-C06	Archaea; Euryarchaeota; Thermoplasmata; Thermoplasmatales; unclassified Thermoplasmatales; unclassified Thermoplasmatales (miscellaneous)	593453	510703	57240	453463	50	88.7919
Haladaptatus litoreus	Archaea; Euryarchaeota; Halobacteria; Halobacteriales; Halobacteriaceae; Haladaptatus	4671707	4668809	502743	4166066	52	89.2319
Planctomycetes bacterium RBG_16_55_9,	Bacteria; PVC group; Planctomycetes; unclassified Planctomycetes	5142485	5142485	513700	4628785	393	90.0107
Archaeon GW2011_AR17 QT08_C0001	Archaea; unclassified Archaea; unclassified Archaea (miscellaneous)	637001	637001	60652	576349	26	90.4785
Latescibacteria bacterium DG_63	Bacteria; FCB group; Candidatus Latescibacteria; unclassified Candidatus Latescibacteria	3519707	3519707	314759	3204948	83	91.0572
Candidatus Curtissbacteria bacterium GW2011_GWC2_38_9 UT12_C0001	Bacteria; unclassified Bacteria; Bacteria candidate phyla; Patescibacteria group; Microgenomates group	567388	567388	50595	516793	32	91.0828
Archaeon GW2011_AR1 QJ16_C0001	Archaea; unclassified Archaea; unclassified Archaea (miscellaneous)	562091	562091	48646	513445	25	91.3455
GCA_001818865.1_ASM181886v1_genomic.fna.fasta		528833	528833	44385	484448	54	91.607
Candidatus Komeilibacteria bacterium RIFOXYD2_FULL_37_8	Bacteria; unclassified Bacteria; Bacteria candidate phyla; Patescibacteria group; Parcubacteria group; Candidatus Komeilibacteria	2115618	2115618	174490	1941128	78	91.7523
Ignavibacteria bacterium GWA2_54_16	Bacteria; FCB group; Bacteroidetes/Chlorobi group; Ignavibacteriae; Ignavibacteria; unclassified Ignavibacteria	2302958	2302958	172605	2130353	117	92.5051
Candidatus Iainarchaeum andersonii SCGC AAA011-E11	Archaea; DPANN group; Candidatus Diapherotrites; Candidatus Iainarchaeum; Candidatus Iainarchaeum andersonii	1098042	1098042	81802	1016240	43	92.5502
Archaeon GW2011_AR4 QS99_C0001	Archaea; unclassified Archaea; unclassified Archaea (miscellaneous)	1233349	1233349	88848	1144501	19	92.7962
Candidatus Nitrososphaera gargensis Ga9.2	Archaea; TACK group; Thaumarchaeota; Nitrososphaeria; Nitrososphaerales; Nitrososphaeraceae; Nitrososphaera; Candidatus Nitrososphaera gargensis	2833868	2833868	200000	2633868	29	92.9425
Candidatus Peribacteria bacterium RIFCSPHIGHO2_01_FULL_55_13	Bacteria; unclassified Bacteria; Bacteria candidate phyla; Candidatus Peregrinibacteria; Candidatus Peribacteria;	1166479	1166479	80397	1086082	43	93.1077
CG_4_10_14_0_8_um_filter_cor_CG_Beckwith_02_43_33	Bacteria; unclassified Bacteria; Bacteria candidate phyla; Patescibacteria group; Microgenomates group	376426	209130	14401	194729	46	93.1139
CG_4_10_14_0_8_um_filter_cor_CG_Pacearch_05_32_75	Archaea; DPANN group	775811	775811	52763	723048	94	93.199
Atopobium parvulum DSM 20469	Bacteria; Terrabacteria group; Actinobacteria; Coriobacteriia; Coriobacteriales; Atopobiaceae; Atopobium; Atopobium parvulum	1543805	1543805	100000	1443805	16	93.5225
Candidatus Glassbacteria bacterium RBG_16_58_8	Bacteria; unclassified Bacteria; Bacteria candidate phyla; Candidatus Glassbacteria	883905	883905	52555	831350	106	94.0542
Chloroflexi bacterium RBG_19FT_COMBO_48_23	Bacteria; Terrabacteria group; Chloroflexi; unclassified Chloroflexi; unclassified Chloroflexi (miscellaneous)	706002	706002	41140	664862	83	94.1728
CG_4_10_14_0_8_um_filter_cor_Pacearchaeota_34_17	Archaea; DPANN group	215315	128062	7098	120964	23	94.4574
Archaeon GW2011_AR11 QT04_C0001	Archaea; unclassified Archaea; unclassified Archaea (miscellaneous)	916385	916385	49700	866685	61	94.5765
Candidatus Levybacteria bacterium GW2011_GWB1_41_21 UU52_C0001	Bacteria; unclassified Bacteria; Bacteria candidate phyla; Patescibacteria group; Microgenomates group; Candidatus Levybacteria	567737	567737	29904	537833	42	94.7328
Candidate division WWE3 bacterium GW2011_GWA1_43_94 UW13_C0001	Bacteria; unclassified Bacteria; Bacteria candidate phyla	891856	891856	44244	847612	20	95.0391
Corynebacterium argentoratense DSM 44202	Bacteria; Terrabacteria group; Actinobacteria; Actinobacteria; Corynebacteriales; Corynebacteriaceae; Corynebacterium; Corynebacterium argentoratense	2031902	2031902	100000	1931902	21	95.0785
Candidate division CPR2 bacterium GW2011_GWD1_39_7 UT59_C0001	Bacteria; unclassified Bacteria; Bacteria candidate phyla	681366	681366	31718	649648	74	95.3449
Candidatus Entotheonella sp. TSY2	Bacteria; Nitrospinae/Tectomicrobia group; Candidatus Tectomicrobia; Candidatus Entotheonella	19151376	14627723	592793	14034930	1869	95.9475
Nitrospinae bacterium RIFCSPLOWO2_12_FULL_47_7	Bacteria; Nitrospinae/Tectomicrobia group; Nitrospinae; unclassified Nitrospinae	1450656	613724	24512	589212	136	96.006
Chondromyces apiculatus	Bacteria; Proteobacteria; delta/epsilon subdivisions; Deltaproteobacteria; Myxococcales; Sorangiineae; Polyangiaceae; Chondromyces	11577721	11577721	437475	11140246	182	96.2214
Nitrospirae bacterium RBG_13_43_8	Bacteria; Nitrospirae; unclassified Nitrospirae	2608363	2608363	96939	2511424	227	96.2835
Ruminobacter sp. RM87	Bacteria; Proteobacteria; Gammaproteobacteria; Aeromonadales; Succinivibrionaceae; Ruminobacter	2861669	2810777	100075	2710702	95	96.4396
CG_4_10_14_0_8_um_filter_cor_Roizmanbacteria_36_73	Bacteria; unclassified Bacteria; Bacteria candidate phyla; Patescibacteria group; Microgenomates group	755482	721131	23650	697481	76	96.7204
Candidate division TA06 bacterium SM1_40	Bacteria; unclassified Bacteria; Bacteria candidate phyla; candidate division TA06	2559446	2559446	83439	2476007	197	96.74
Omnitrophica bacterium SCGC AAA257-O07	Bacteria; PVC group; Candidatus Omnitrophica; unclassified Candidatus Omnitrophica	767845	756694	23265	733429	55	96.9254
Candidate division KD3-62 bacterium DG_56	Bacteria; unclassified Bacteria; Bacteria candidate phyla; candidate division KD3-62	1238975	1238975	37307	1201668	144	96.9889
Diplosphaera colitermitum TAV2	Bacteria; PVC group; Verrucomicrobia; Opitutae; Opitutales; Opitutaceae; Diplosphaera; Diplosphaera colitermitum	11342994	11185242	321214	10864028	334	97.1282
Chloroflexi bacterium RBG_13_46_14	Bacteria; Terrabacteria group; Chloroflexi; unclassified Chloroflexi; unclassified Chloroflexi (miscellaneous)	1678903	1678903	48107	1630796	199	97.1346
Candidatus Gottesmanbacteria bacterium GW2011_GWA2_42_18 UV09_C0001	Bacteria; unclassified Bacteria; Bacteria candidate phyla; Patescibacteria group; Microgenomates group	1241278	1241278	34783	1206495	53	97.1978
Candidate division WWE3 bacterium RIFOXYB1_FULL_42_27	Bacteria; unclassified Bacteria; Bacteria candidate phyla; candidate division WWE3	777980	777980	20434	757546	25	97.3735
Cloacimonetes bacterium SCGC AAA252-N14	Bacteria; FCB group; Candidatus Cloacimonetes; unclassified Candidatus Cloacimonetes	2055867	1996339	47223	1949116	134	97.6345
Candidatus Amesbacteria bacterium RIFCSPLOWO2_01_FULL_48_50	Bacteria; unclassified Bacteria; Bacteria candidate phyla; Patescibacteria group; Microgenomates group; Candidatus Amesbacteria	776953	776953	18008	758945	58	97.6822
Haladaptatus paucihalophilus DX253	Archaea; Euryarchaeota; Halobacteria; Halobacteriales; Halobacteriaceae; Haladaptatus; Haladaptatus paucihalophilus	4317540	4317540	100000	4217540	46	97.6839
Candidate division CPR3 bacterium RIFOXYB2_FULL_35_8	Bacteria; unclassified Bacteria; Bacteria candidate phyla; candidate division CPR3	1071545	1071545	24632	1046913	59	97.7013
Mycoplasma hyopneumoniae 168-L	Bacteria; Terrabacteria group; Tenericutes; Mollicutes; Mycoplasmatales; Mycoplasmataceae; Mycoplasma; Mycoplasma hyopneumoniae; Mycoplasma hyopneumoniae 168	921093	921093	21093	900000	10	97.71
Chloroflexi bacterium RBG_16_56_8	Bacteria; Terrabacteria group; Chloroflexi; unclassified Chloroflexi; unclassified Chloroflexi (miscellaneous)	2168217	2168217	49490	2118727	269	97.7175
Peptostreptococcaceae bacterium AS15	Bacteria; Terrabacteria group; Firmicutes; Clostridia; Clostridiales; Peptostreptococcaceae; unclassified Peptostreptococcaceae; unclassified Peptostreptococcaceae (miscellaneous)	2654638	2647004	53377	2593627	46	97.9835
Chloroflexi bacterium RBG_16_69_14	Bacteria; Terrabacteria group; Chloroflexi; unclassified Chloroflexi; unclassified Chloroflexi (miscellaneous)	2759408	2758577	51350	2707227	195	98.1385
Limnohabitans sp. Rim28	Bacteria; Proteobacteria; Betaproteobacteria; Burkholderiales; Comamonadaceae; Limnohabitans	6823422	6749132	121330	6627802	66	98.2023
CG_4_10_14_0_8_um_filter_cor_CG_CPR12_01_48_154		868716	868716	13859	854857	43	98.4047
Gemmatimonas sp. SG8_28	Bacteria; FCB group; Gemmatimonadetes; Gemmatimonadetes; Gemmatimonadales; Gemmatimonadaceae; Gemmatimonas	3856507	3856507	59088	3797419	430	98.4678
Candidatus Beckwithbacteria bacterium RIFCSPHIGHO2_02_FULL_49_13	Bacteria; unclassified Bacteria; Bacteria candidate phyla; Patescibacteria group; Microgenomates group; Candidatus Beckwithbacteria	1019502	1019502	15605	1003897	23	98.4694
Phycisphaerae bacterium SM23_33	Bacteria; PVC group; Planctomycetes; Phycisphaerae; unclassified Phycisphaerae	3426709	3426709	50989	3375720	322	98.512
Gloeocapsa sp. PCC 73106	Bacteria; Terrabacteria group; Cyanobacteria/Melainabacteria group; Cyanobacteria; Oscillatoriophycideae; Chroococcales; Chroococcaceae; Gloeocapsa	8050228	7881366	99838	7781528	362	98.7332
Candidatus Chisholmbacteria bacterium RIFCSPHIGHO2_01_FULL_48_12	Bacteria; unclassified Bacteria; Bacteria candidate phyla; Patescibacteria group; Microgenomates group; Candidatus Chisholmbacteria	901658	901658	11397	890261	65	98.736
Candidatus Kinetoplastibacterium oncopeltii TCC290E	Bacteria; Proteobacteria; Betaproteobacteria; unclassified Betaproteobacteria; Kinetoplastibacterium; Candidatus Kinetoplastibacterium oncopeltii	810172	810172	10172	800000	9	98.7445
Clostridium autoethanogenum DSM 10061	Bacteria; Terrabacteria group; Firmicutes; Clostridia; Clostridiales; Clostridiaceae; Clostridium; Clostridium autoethanogenum	4352446	4352446	52446	4300000	44	98.795
Proteocatella sphenisci DSM 23131	Bacteria; Terrabacteria group; Firmicutes; Clostridia; Clostridiales; Peptostreptococcaceae; Proteocatella; Proteocatella sphenisci	2411055	2402856	28509	2374347	41	98.8135
Omnitrophica bacterium RBG_13_46_9	Bacteria; PVC group; Candidatus Omnitrophica; unclassified Candidatus Omnitrophica	2045377	2045377	23926	2021451	86	98.8302
Ideonella sp. B508-1	Bacteria; Proteobacteria; Betaproteobacteria; Burkholderiales; unclassified Burkholderiales; Burkholderiales Genera incertae sedis; Ideonella	4936752	4576256	53316	4522940	376	98.8349
Candidatus Buchananbacteria bacterium RIFCSPHIGHO2_02_FULL_56_16	Bacteria; unclassified Bacteria; Bacteria candidate phyla; Patescibacteria group; Parcubacteria group; Candidatus Buchananbacteria	1056120	1056120	11163	1044957	39	98.943
CG_4_10_14_0_8_um_filter_cor_CG_Elusi_05_37_32	Bacteria; Elusimicrobia; unclassified Elusimicrobia	1856956	1856956	19328	1837628	184	98.9592
Candidatus Doudnabacteria bacterium RIFCSPHIGHO2_01_FULL_46_24	Bacteria; unclassified Bacteria; Bacteria candidate phyla; Candidatus Doudnabacteria	847051	847051	8747	838304	18	98.9674
Atribacteria bacterium SCGC AAA255-G05	Bacteria; unclassified Bacteria; Bacteria candidate phyla; Candidatus Atribacteria; unclassified Atribacteria	1653325	1611206	16514	1594692	114	98.9751
Alloscardovia omnicolens DSM 21503	Bacteria; Terrabacteria group; Actinobacteria; Actinobacteria; Bifidobacteriales; Bifidobacteriaceae; Alloscardovia; Alloscardovia omnicolens	3694292	3663360	36648	3626712	70	98.9996
Candidatus Latescibacter anaerobius SCGC AAA252-E07	Bacteria; FCB group; Candidatus Latescibacteria; Candidatus Latescibacter; Candidatus Latescibacter anaerobius	2290285	2227714	19991	2207723	139	99.1026
Candidatus Firestonebacteria bacterium GWA2_43_8	Bacteria; unclassified Bacteria; Bacteria candidate phyla; Candidatus Firestonebacteria	1695167	1695167	14927	1680240	188	99.1194
Lentisphaera araneosa HTCC2155	Bacteria; PVC group; Lentisphaerae; Lentisphaeria; Lentisphaerales; Lentisphaeraceae; Lentisphaera; Lentisphaera araneosa	6023180	6000497	50892	5949605	65	99.1519
Aerophobetes bacterium JGI 0000014-C22	Bacteria; unclassified Bacteria; Bacteria candidate phyla; Candidatus Aerophobetes; unclassified Aerophobetes	428566	404570	3089	401481	41	99.2365
Atopobacter phocae ATCC BAA-285	Bacteria; Terrabacteria group; Firmicutes; Bacilli; Lactobacillales; Carnobacteriaceae; Atopobacter; Atopobacter phocae	1666387	1643520	12404	1631116	70	99.2453
Hydrogenedentes bacterium JGI 0000039-J10	Bacteria; FCB group; Candidatus Hydrogenedentes; unclassified Candidatus Hydrogenedentes	2924052	2879155	21454	2857701	94	99.2549
Gemmatimonadetes bacterium RBG_16_66_8	Bacteria; FCB group; Gemmatimonadetes; unclassified Gemmatimonadetes	2645735	2643215	19465	2623750	275	99.2636
Halonotius sp. J07HN4	Archaea; Euryarchaeota; Halobacteria; Haloferacales; Halorubraceae; Halonotius	5686390	5479287	38468	5440819	198	99.2979
Candidate division NC10 bacterium RIFCSPLOWO2_02_FULL_66_22	Bacteria; unclassified Bacteria; Bacteria candidate phyla; candidate division NC10; unclassified candidate division NC10	4424322	4424322	29036	4395286	218	99.3437
Candidatus Daviesbacteria bacterium GW2011_GWA2_39_33 UT45_C0001	Bacteria; unclassified Bacteria; Bacteria candidate phyla; Patescibacteria group; Microgenomates group	1272388	1272388	8259	1264129	22	99.3509
Tuberibacillus calidus DSM 17572	Bacteria; Terrabacteria group; Firmicutes; Bacilli; Bacillales; Sporolactobacillaceae; Tuberibacillus; Tuberibacillus calidus	3242009	3227908	20947	3206961	74	99.3511
Omnitrophica WOR_2 bacterium RIFCSPHIGHO2_02_FULL_63_39	Bacteria; PVC group; Candidatus Omnitrophica; unclassified Candidatus Omnitrophica	1395103	1395103	8693	1386410	61	99.3769
CGFER2_1		2487652	2478461	14618	2463843	173	99.4102
Lachnoanaerobaculum sp. ICM7	Bacteria; Terrabacteria group; Firmicutes; Clostridia; Clostridiales; Lachnospiraceae; Lachnoanaerobaculum	2779958	2772436	15340	2757096	35	99.4467
Bdellovibrionales bacterium RIFOXYD1_FULL_53_11	Bacteria; Proteobacteria; delta/epsilon subdivisions; Deltaproteobacteria; Bdellovibrionales; unclassified Bdellovibrionales	3374422	3374422	18311	3356111	154	99.4574
Chloroflexi bacterium RIFCSPLOWO2_12_FULL_71_12	Bacteria; Terrabacteria group; Chloroflexi; unclassified Chloroflexi; unclassified Chloroflexi (miscellaneous)	1695220	1695220	9157	1686063	155	99.4598
Ktedonobacter racemifer DSM 44963 strain SOSP1-21	Bacteria; Terrabacteria group; Chloroflexi; Ktedonobacteria; Ktedonobacterales; Ktedonobacteraceae; Ktedonobacter; Ktedonobacter racemifer	13661586	13660007	73767	13586240	9	99.46
Natronolimnobius innermongolicus JCM 12255	Archaea; Euryarchaeota; Halobacteria; Natrialbales; Natrialbaceae; Natronolimnobius; Natronolimnobius innermongolicus	4588634	4568594	22173	4546421	95	99.5147
Oscillatoria sp. PCC 6506	Bacteria; Terrabacteria group; Cyanobacteria/Melainabacteria group; Cyanobacteria; Oscillatoriophycideae; Oscillatoriales; Microcoleaceae; Kamptonema	6676705	6544317	31451	6512866	297	99.5194
Elusimicrobia bacterium RIFOXYB2_FULL_48_7	Bacteria; Elusimicrobia; unclassified Elusimicrobia	2198698	2198698	10406	2188292	223	99.5267
Pyrobaculum calidifontis JCM 11548	Archaea; TACK group; Crenarchaeota; Thermoprotei; Thermoproteales; Thermoproteaceae; Pyrobaculum; Pyrobaculum calidifontis	2009313	2009313	9313	2000000	21	99.5365
Halopelagius longus	Archaea; Euryarchaeota; Halobacteria; Haloferacales; Haloferacaceae; Halopelagius	3871751	3869186	15664	3853522	42	99.5952
Halogranum salarium B-1	Archaea; Euryarchaeota; Halobacteria; Haloferacales; Haloferacaceae; Halogranum; Halogranum salarium	4492306	4492306	15914	4476392	17	99.6457
CG_4_10_14_0_8_um_filter_cor_CG_Verruco_01_43_34	Bacteria; PVC group	1821726	1786758	6055	1780703	67	99.6611
Desulfatiglans anilini DSM 4660	Bacteria; Proteobacteria; delta/epsilon subdivisions; Deltaproteobacteria; Desulfobacterales; Desulfobacteraceae; Desulfatiglans; Desulfatiglans anilini	4667344	4627531	15495	4612036	85	99.6652
Natronorubrum sulfidifaciens JCM 14089	Archaea; Euryarchaeota; Halobacteria; Natrialbales; Natrialbaceae; Natronorubrum; Natronorubrum sulfidifaciens	3460288	3436057	11002	3425055	33	99.6798
Halococcus saccharolyticus DSM 5350	Archaea; Euryarchaeota; Halobacteria; Halobacteriales; Halococcaceae; Halococcus; Halococcus saccharolyticus	3449700	3443115	10859	3432256	30	99.6846
Omnitrophica bacterium RIFCSPLOWO2_01_FULL_45_10b	Bacteria; PVC group; Candidatus Omnitrophica; unclassified Candidatus Omnitrophica	1843590	1843590	5750	1837840	75	99.6881
Rhodohalobacter halophila	Bacteria; Balneolaeota; Balneolia; Balneolales; Balneolaceae; Rhodohalobacter	3122722	3122722	9582	3113140	92	99.6932
Natronococcus amylolyticus	Archaea; Euryarchaeota; Halobacteria; Natrialbales; Natrialbaceae; Natronococcus	4416525	4404428	12767	4391661	67	99.7101
Calescamantes bacterium JGI 0000106-J16	Bacteria; unclassified Bacteria; Bacteria candidate phyla; Candidatus Calescamantes; unclassified Calescamantes	1075924	1075924	3064	1072860	55	99.7152
Aminicenantes bacterium SCGC AAA252-K06	Bacteria; unclassified Bacteria; Bacteria candidate phyla; Candidatus Aminicenantes; unclassified Aminicenantes	1184457	1149612	3052	1146560	88	99.7345
Acetonema longum DSM 6540	Bacteria; Terrabacteria group; Firmicutes; Negativicutes; Selenomonadales; Sporomusaceae; Acetonema; Acetonema longum	4323011	4159972	10934	4149038	133	99.7372
Enterovibrio coralii	Bacteria; Proteobacteria; Gammaproteobacteria; Vibrionales; Vibrionaceae; Enterovibrio	5501999	5501999	12958	5489041	72	99.7645
Marinimicrobium agarilyticum DSM 16975	Bacteria; Proteobacteria; Gammaproteobacteria; Cellvibrionales; Cellvibrionaceae; Marinimicrobium; Marinimicrobium agarilyticum	4502291	4493415	8536	4484879	24	99.81
Candidatus Nitrosopumilus adriaticus strain NF5	Archaea; TACK group; Thaumarchaeota; Nitrosopumilales; Nitrosopumilaceae; Nitrosopumilus	1803090	1803090	3090	1800000	19	99.8286
Haloplasma contractile SSD-17B	Bacteria; unclassified Bacteria; Haloplasmatales; Haloplasmataceae; Haloplasma; Haloplasma contractile	3404505	3390915	5404	3385511	27	99.8406
Bryobacter aggregatus	Bacteria; Acidobacteria; Solibacteres; Solibacterales; Bryobacteraceae; Bryobacter	5747993	5747993	8158	5739835	4	99.8581
Holdemania sp. AP2	Bacteria; Terrabacteria group; Firmicutes; Erysipelotrichia; Erysipelotrichales; Erysipelotrichaceae; Holdemania; Holdemania massiliensis	3811476	3800011	5005	3795006	8	99.8683
Haloarchaeon 3A1_DGR strain 3A1_DGR	Archaea; Euryarchaeota; Halobacteria; Halobacteriales; unclassified Halobacteriales; unclassified Halobacteriales (miscellaneous)	8637023	8637023	10556	8626467	20	99.8778
Domibacillus antri	Bacteria; Terrabacteria group; Firmicutes; Bacilli; Bacillales; Bacillaceae; Domibacillus	3191515	3191515	3899	3187616	79	99.8778
Acidocella facilis ATCC 35904	Bacteria; Proteobacteria; Alphaproteobacteria; Rhodospirillales; Acetobacteraceae; Acidocella; Acidocella facilis	3403931	3387432	3490	3383942	39	99.897
Halobiforma nitratireducens JCM 10879	Archaea; Euryarchaeota; Halobacteria; Natrialbales; Natrialbaceae; Halobiforma; Halobiforma nitratireducens	3688747	3563418	3583	3559835	122	99.8995
Patulibacter medicamentivorans strain I11	Bacteria; Terrabacteria group; Actinobacteria; Thermoleophilia; Solirubrobacterales; Patulibacteraceae; Patulibacter	5092500	4962242	4277	4957965	266	99.9138
Sporocytophaga myxococcoides DSM 11118	Bacteria; FCB group; Bacteroidetes/Chlorobi group; Bacteroidetes; Cytophagia; Cytophagales; Cytophagaceae; Sporocytophaga; Sporocytophaga myxococcoides	6344326	6335277	5299	6329978	16	99.9164
Oscillochloris trichoides DG-6	Bacteria; Terrabacteria group; Chloroflexi; Chloroflexia; Chloroflexales; Chloroflexineae; Oscillochloridaceae; Oscillochloris; Oscillochloris trichoides	4373075	4371657	3254	4368403	47	99.9256
Marinilabilia salmonicolor JCM 21150	Bacteria; FCB group; Bacteroidetes/Chlorobi group; Bacteroidetes; Bacteroidia; Marinilabiliales; Marinilabiliaceae; Marinilabilia; Marinilabilia salmonicolor	4982627	4963195	3544	4959651	48	99.9286
Catelliglobosispora koreensis DSM 44566	Bacteria; Terrabacteria group; Actinobacteria; Actinobacteria; Micromonosporales; Micromonosporaceae; Catelliglobosispora; Catelliglobosispora koreensis	7688589	7656444	3475	7652969	24	99.9546
Acidianus manzaensis strain YN-25	Archaea; TACK group; Crenarchaeota; Thermoprotei; Sulfolobales; Sulfolobaceae; Acidianus	2687463	2687463	0	2687463	27	100
Nanoarchaeum equitans	Archaea; DPANN group; Nanoarchaeota; Nanoarchaeales; Nanoarchaeaceae; Nanoarchaeum	490885	490885	0	490885	5	100
Methanocella paludicola SANAE	Archaea; Euryarchaeota; Methanomicrobia; Methanocellales; Methanocellaceae; Methanocella; Methanocella paludicola	2957635	2957635	0	2957635	30	100
Aeropyrum pernix K1	Archaea; TACK group; Crenarchaeota; Thermoprotei; Desulfurococcales; Desulfurococcaceae; Aeropyrum; Aeropyrum pernix	1669696	1669696	0	1669696	17	100
Methanoculleus marisnigri JR1	Archaea; Euryarchaeota; Methanomicrobia; Methanomicrobiales; Methanomicrobiaceae; Methanoculleus; Methanoculleus marisnigri	2478101	2478101	0	2478101	25	100
Caldivirga maquilingensis IC-167	Archaea; TACK group; Crenarchaeota; Thermoprotei; Thermoproteales; Thermoproteaceae; Caldivirga; Caldivirga maquilingensis	2077567	2077567	0	2077567	21	100
Methanocaldococcus vulcanius M7	Archaea; Euryarchaeota; Methanococci; Methanococcales; Methanocaldococcaceae; Methanocaldococcus; Methanocaldococcus vulcanius	1761737	1761737	0	1761737	20	100
Vulcanisaeta distributa DSM 14429	Archaea; TACK group; Crenarchaeota; Thermoprotei; Thermoproteales; Thermoproteaceae; Vulcanisaeta; Vulcanisaeta distributa	2374137	2374137	0	2374137	24	100
Mariprofundus ferrooxydans	Bacteria; Proteobacteria; Zetaproteobacteria; Mariprofundales; Mariprofundaceae; Mariprofundus	2992730	2992730	0	2992730	4	100
Methanococcus maripaludis X1	Archaea; Euryarchaeota; Methanococci; Methanococcales; Methanococcaceae; Methanococcus; Methanococcus maripaludis	1746697	1746697	0	1746697	18	100
Sphaerochaeta pleomorpha	Bacteria; Spirochaetes; Spirochaetia; Spirochaetales; Spirochaetaceae; Sphaerochaeta	3590853	3590853	0	3590853	1	100
Leptonema illini	Bacteria; Spirochaetes; Spirochaetia; Leptospirales; Leptospiraceae; Leptonema	4522760	4522760	0	4522760	3	100
Leptospira broomii	Bacteria; Spirochaetes; Spirochaetia; Leptospirales; Leptospiraceae; Leptospira	4395904	4395904	0	4395904	12	100
Fervidicoccus fontis	Archaea; TACK group; Crenarchaeota; Thermoprotei; Fervidicoccales; Fervidicoccaceae; Fervidicoccus	1319206	1319206	0	1319206	14	100
Brevibacillus massiliensis	Bacteria; Terrabacteria group; Firmicutes; Bacilli; Bacillales; Paenibacillaceae; Brevibacillus	5060362	5060362	0	5060362	37	100
Halorubrum hochstenium	Archaea; Euryarchaeota; Halobacteria; Haloferacales; Halorubraceae; Halorubrum	3037532	3020093	0	3020093	58	100
Natrialba hulunbeirensis	Archaea; Euryarchaeota; Halobacteria; Natrialbales; Natrialbaceae; Natrialba	4159606	4146538	0	4146538	62	100
Acidobacteriaceae bacterium	Bacteria; Acidobacteria; Acidobacteriia; Acidobacteriales	6250814	6250814	0	6250814	21	100
Dickeya paradisiaca	Bacteria; Proteobacteria; Gammaproteobacteria; Enterobacterales; Pectobacteriaceae; Dickeya	4631867	4631867	0	4631867	1	100
Ferrimonas senticii	Bacteria; Proteobacteria; Gammaproteobacteria; Alteromonadales; Ferrimonadaceae; Ferrimonas	3885737	3885737	0	3885737	30	100
Brachyspira alvinipulli	Bacteria; Spirochaetes; Spirochaetia; Brachyspirales; Brachyspiraceae; Brachyspira	3420763	3420763	0	3420763	22	100
Sulfurihydrogenibium subterraneum	Bacteria; Aquificae; Aquificae; Aquificales; Hydrogenothermaceae; Sulfurihydrogenibium	1610181	1610181	0	1610181	16	100
Zetaproteobacteria bacterium	Bacteria; Proteobacteria	2163552	2163552	0	2163552	13	100
Silvibacterium bohemicum	Bacteria; Acidobacteria; Acidobacteriia; Acidobacteriales; Acidobacteriaceae; Silvibacterium	6459122	6459122	0	6459122	25	100
Haloferax gibbonsii	Archaea; Euryarchaeota; Halobacteria; Haloferacales; Haloferacaceae; Haloferax	3918454	3918454	0	3918454	42	100
Desulfuromonas sp. WTL	Bacteria; Proteobacteria; delta/epsilon subdivisions; Deltaproteobacteria; Desulfuromonadales; Desulfuromonadaceae; Desulfuromonas	3958620	3958620	0	3958620	1	100
Halanaeroarchaeum sulfurireducens	Archaea; Euryarchaeota; Halobacteria; Halobacteriales; unclassified Halobacteriales; Halanaeroarchaeum	2253500	2253500	0	2253500	24	100
Thermosulfidibacter takaii	Bacteria; Aquificae; Aquificae; Aquificales; Aquificales genera incertae sedis; Thermosulfidibacter	1816670	1816670	0	1816670	1	100
Ilumatobacter coccineus YM16-304	Bacteria; Terrabacteria group; Actinobacteria; Acidimicrobiia; Acidimicrobiales; Acidimicrobiaceae; Ilumatobacter; Ilumatobacter coccineus	4830181	4830181	0	4830181	49	100
Trueperella pyogenes strain TP6375	Bacteria; Terrabacteria group; Actinobacteria; Actinobacteria; Actinomycetales; Actinomycetaceae; Trueperella	2338390	2338390	0	2338390	24	100
Blastococcus saxobsidens DD2	Bacteria; Terrabacteria group; Actinobacteria; Actinobacteria; Geodermatophilales; Geodermatophilaceae; Blastococcus; Blastococcus saxobsidens	4875340	4875340	0	4875340	49	100
Brachybacterium faecium DSM 4810	Bacteria; Terrabacteria group; Actinobacteria; Actinobacteria; Micrococcales; Dermabacteraceae; Brachybacterium; Brachybacterium faecium	3614992	3614992	0	3614992	37	100
Kribbella flavida DSM 17836	Bacteria; Terrabacteria group; Actinobacteria; Actinobacteria; Propionibacteriales; Nocardioidaceae; Kribbella; Kribbella flavida	7579488	7579488	0	7579488	76	100
Actinosynnema mirum DSM 43827	Bacteria; Terrabacteria group; Actinobacteria; Actinobacteria; Pseudonocardiales; Pseudonocardiaceae; Actinosynnema; Actinosynnema mirum	8248144	8248144	0	8248144	83	100
Streptacidiphilus oryzae TH49	Bacteria; Terrabacteria group; Actinobacteria; Actinobacteria; Streptomycetales; Streptomycetaceae; Streptacidiphilus; Streptacidiphilus oryzae	7806543	7806543	0	7806543	82	100
Nocardiopsis alba ATCC BAA-2165	Bacteria; Terrabacteria group; Actinobacteria; Actinobacteria; Streptosporangiales; Nocardiopsaceae; Nocardiopsis; Nocardiopsis alba	5848211	5848211	0	5848211	59	100
Gordonia bronchialis DSM 43247	Bacteria; Terrabacteria group; Actinobacteria; Actinobacteria; Corynebacteriales; Gordoniaceae; Gordonia; Gordonia bronchialis	5208602	5208602	0	5208602	53	100
Senegalimassilia anaerobia JC110	Bacteria; Terrabacteria group; Actinobacteria; Coriobacteriia; Coriobacteriales; Coriobacteriaceae; Senegalimassilia; Senegalimassilia anaerobia	2398022	2383131	0	2383131	8	100
Hydrogenobacter thermophilus TK-6	Bacteria; Aquificae; Aquificae; Aquificales; Aquificaceae; Hydrogenobacter; Hydrogenobacter thermophilus	1743135	1743135	0	1743135	18	100
Fimbriimonas ginsengisoli Gsoil 348	Bacteria; Terrabacteria group; Armatimonadetes; Fimbriimonadia; Fimbriimonadales; Fimbriimonadaceae; Fimbriimonas; Fimbriimonas ginsengisoli	5231762	5231762	0	5231762	53	100
Rhodothermus marinus DSM 4252	Bacteria; FCB group; Bacteroidetes/Chlorobi group; Bacteroidetes; Bacteroidetes Order II. Incertae sedis; Rhodothermaceae; Rhodothermus; Rhodothermus marinus	3261604	3261604	0	3261604	33	100
Porphyromonas gingivalis W83	Bacteria; FCB group; Bacteroidetes/Chlorobi group; Bacteroidetes; Bacteroidia; Bacteroidales; Porphyromonadaceae; Porphyromonas; Porphyromonas gingivalis	2343476	2343476	0	2343476	24	100
Belliella baltica DSM 15883	Bacteria; FCB group; Bacteroidetes/Chlorobi group; Bacteroidetes; Cytophagia; Cytophagales; Cyclobacteriaceae; Belliella; Belliella baltica	4196595	4196595	0	4196595	42	100
Cellulophaga lytica strain HI1	Bacteria; FCB group; Bacteroidetes/Chlorobi group; Bacteroidetes; Flavobacteriia; Flavobacteriales; Flavobacteriaceae; Cellulophaga	3824196	3824196	0	3824196	39	100
Zunongwangia profunda SM-A87	Bacteria; FCB group; Bacteroidetes/Chlorobi group; Bacteroidetes; Flavobacteriia; Flavobacteriales; Flavobacteriaceae; Zunongwangia; Zunongwangia profunda	5128187	5128187	0	5128187	52	100
Gracilimonas tropica DSM 19535	Bacteria; Balneolaeota; Balneolia; Balneolales; Balneolaceae; Gracilimonas; Gracilimonas tropica	3831242	3803597	0	3803597	33	100
Solitalea canadensis DSM 3403	Bacteria; FCB group; Bacteroidetes/Chlorobi group; Bacteroidetes; Sphingobacteriia; Sphingobacteriales; Sphingobacteriaceae; Solitalea; Solitalea canadensis	5202069	5200000	0	5200000	52	100
Chloroherpeton thalassium ATCC 35110	Bacteria; FCB group; Bacteroidetes/Chlorobi group; Chlorobi; Chlorobia; Chlorobiales; Chlorobiaceae; Chloroherpeton; Chloroherpeton thalassium	3293456	3293456	0	3293456	33	100
Melioribacter roseus P3M	Bacteria; FCBBacteria; Caldiserica; Caldisericia; Caldisericales; Caldisericaceae; Caldisericum; Caldisericum exile group; Bacteroidetes/Chlorobi group; Ignavibacteriae; Ignavibacteria; Ignavibacteriales; Melioribacteraceae; Melioribacter; Melioribacter roseus	3300414	3300000	0	3300000	33	100
Caldisericum exile AZM16c01	Bacteria; Caldiserica; Caldisericia; Caldisericales; Caldisericaceae; Caldisericum; Caldisericum exile	1558103	1558103	0	1558103	16	100
Chlamydophila abortus strain S26/3	Bacteria; PVC group; Chlamydiae; Chlamydiia; Chlamydiales; Chlamydiaceae; Chlamydia/Chlamydophila group; Chlamydia	1144377	1144377	0	1144377	12	100
Akkermansia muciniphila ATCC BAA-835	Bacteria; PVC group; Verrucomicrobia; Verrucomicrobiae; Verrucomicrobiales; Akkermansiaceae; Akkermansia; Akkermansia muciniphila	2664102	2664102	0	2664102	27	100
Caldilinea aerophila DSM 14535	Bacteria; Terrabacteria group; Chloroflexi; Caldilineae; Caldilineales; Caldilineaceae; Caldilinea; Caldilinea aerophila	5144873	5144873	0	5144873	52	100
Dehalococcoides sp. CBDB1	Bacteria; Terrabacteria group; Chloroflexi; Dehalococcoidia; Dehalococcoidales; Dehalococcoidaceae; Dehalococcoides; Dehalococcoides mccartyi	1395502	1395502	0	1395502	14	100
Chloroflexi bacterium GWB2_54_36	Bacteria; Terrabacteria group; Chloroflexi; unclassified Chloroflexi; unclassified Chloroflexi (miscellaneous)	2894515	2894515	0	2894515	103	100
Thermomicrobium roseum DSM 5159	Bacteria; Terrabacteria group; Chloroflexi; Thermomicrobia; Thermomicrobiales; Thermomicrobiaceae; Thermomicrobium; Thermomicrobium roseum	2003006	2003006	0	2003006	21	100
Desulfurispirillum indicum S5	Bacteria; Chrysiogenetes; Chrysiogenetes; Chrysiogenales; Chrysiogenaceae; Desulfurispirillum; Desulfurispirillum indicum	2928377	2928377	0	2928377	30	100
Candidatus Methylomirabilis oxyfera	Bacteria; unclassified Bacteria; Bacteria candidate phyla; candidate division NC10; Candidatus Methylomirabilis	2752854	2752854	0	2752854	28	100
Candidatus Rokubacteria bacterium RIFCSPLOWO2_12_FULL_71_22	Bacteria; unclassified Bacteria; Bacteria candidate phyla; Candidatus Rokubacteria	3444169	3444169	0	3444169	327	100
Candidate division TM6 bacterium GW2011_GWE2_42_60	Bacteria; unclassified Bacteria; Bacteria candidate phyla; Candidatus Dependentiae; unclassified Candidatus Dependentiae	1138813	1138813	0	1138813	15	100
Cloacimonetes bacterium JGI 0000039-M09	Bacteria; FCB group; Candidatus Cloacimonetes; unclassified Candidatus Cloacimonetes	518395	502538	0	502538	38	100
Candidate division Zixibacteria bacterium RBG-1 RBG1_1C00001	Bacteria; FCB group; candidate division Zixibacteria	2122767	2122767	0	2122767	22	100
Gloeobacter violaceus PCC 7421	Bacteria; Terrabacteria group; Cyanobacteria/Melainabacteria group; Cyanobacteria; Gloeobacteria; Gloeobacterales; Gloeobacteraceae; Gloeobacter; Gloeobacter violaceus	4659019	4659019	0	4659019	47	100
Calothrix sp. PCC 6303	Bacteria; Terrabacteria group; Cyanobacteria/Melainabacteria group; Cyanobacteria; Nostocales; Rivulariaceae; Calothrix; Calothrix parietina	6767834	6767834	0	6767834	68	100
Pleurocapsa sp. PCC 7327	Bacteria; Terrabacteria group; Cyanobacteria/Melainabacteria group; Cyanobacteria; Pleurocapsales; Hyellaceae; Pleurocapsa; Pleurocapsa minor	4986817	4986817	0	4986817	50	100
Flexistipes sinusarabici DSM 4947	Bacteria; Deferribacteres; Deferribacteres; Deferribacterales; Deferribacteraceae; Flexistipes; Flexistipes sinusarabici	2526590	2526590	0	2526590	26	100
Marinithermus hydrothermalis DSM 14884	Bacteria; Terrabacteria group; Deinococcus-Thermus; Deinococci; Thermales; Thermaceae; Marinithermus; Marinithermus hydrothermalis	2269167	2269167	0	2269167	23	100
Dictyoglomus turgidum DSM 6724	Bacteria; Dictyoglomi; Dictyoglomia; Dictyoglomales; Dictyoglomaceae; Dictyoglomus; Dictyoglomus turgidum	1855560	1855560	0	1855560	19	100
Elusimicrobia bacterium GWA2_51_34	Bacteria; Elusimicrobia; unclassified Elusimicrobia	2631312	2631312	0	2631312	43	100
Elusimicrobia bacterium RIFCSPLOWO2_01_FULL_59_12	Bacteria; Elusimicrobia; unclassified Elusimicrobia	2211476	2211476	0	2211476	77	100
Granulicella mallensis MP5ACTX8	Bacteria; Acidobacteria; Acidobacteriia; Acidobacteriales; Acidobacteriaceae; Granulicella; Granulicella mallensis	6237577	6237577	0	6237577	63	100
Geobacillus kaustophilus HTA426	Bacteria; Terrabacteria group; Firmicutes; Bacilli; Bacillales; Bacillaceae; Geobacillus; Geobacillus thermoleovorans group; Geobacillus kaustophilus	3544776	3544776	0	3544776	36	100
Thermicanus aegyptius DSM 12793	Bacteria; Terrabacteria group; Firmicutes; Bacilli; Bacillales; Bacillales incertae sedis; Bacillales Family X. Incertae Sedis; Thermicanus; Thermicanus aegyptius	3657623	3657623	0	3657623	37	100
Butyricicoccus pullicaecorum	Bacteria; Terrabacteria group; Firmicutes; Clostridia; Clostridiales; Clostridiaceae; Butyricicoccus	3325721	3325721	0	3325721	35	100
Clostridium innocuum 2959	Bacteria; Terrabacteria group; Firmicutes; Erysipelotrichia; Erysipelotrichales; Erysipelotrichaceae; Erysipelatoclostridium; [Clostridium] innocuum	4803668	4802481	0	4802481	50	100
Acetobacterium woodii DSM 1030	Bacteria; Terrabacteria group; Firmicutes; Clostridia; Clostridiales; Eubacteriaceae; Acetobacterium; Acetobacterium woodii	4044777	4044777	0	4044777	41	100
Pelotomaculum thermopropionicum SI	Bacteria; Terrabacteria group; Firmicutes; Clostridia; Clostridiales; Peptococcaceae; Pelotomaculum; Pelotomaculum thermopropionicum	3025375	3025375	0	3025375	31	100
Ruminococcus obeum A2-162	Bacteria; Terrabacteria group; Firmicutes; Clostridia; Clostridiales; Lachnospiraceae; Blautia; Blautia obeum	3757491	3757491	0	3757491	38	100
Caldanaerobius polysaccharolyticus DSM 13641	Bacteria; Terrabacteria group; Firmicutes; Clostridia; Thermoanaerobacterales; Thermoanaerobacteraceae; Caldanaerobius; Caldanaerobius polysaccharolyticus	2499862	2498048	0	2498048	26	100
Veillonella parvula DSM 2008	Bacteria; Terrabacteria group; Firmicutes; Negativicutes; Veillonellales; Veillonellaceae; Veillonella; Veillonella parvula	2132142	2132142	0	2132142	22	100
Streptobacillus moniliformis DSM 12112	Bacteria; Fusobacteria; Fusobacteriia; Fusobacteriales; Leptotrichiaceae; Streptobacillus; Streptobacillus moniliformis	1662578	1662578	0	1662578	17	100
Ignavibacteria bacterium RIFOXYC2_FULL_38_25	Bacteria; FCB group; Bacteroidetes/Chlorobi group; Ignavibacteriae; Ignavibacteria; unclassified Ignavibacteria	4405326	4405326	0	4405326	22	100
Lentisphaerae bacterium GWF2_57_35	Bacteria; PVC group; Lentisphaerae; unclassified Lentisphaerae; unclassified Lentisphaerae (miscellaneous)	5052682	5052682	0	5052682	74	100
Marinimicrobia bacterium JGI 0000059-L03	Bacteria; FCB group; Candidatus Marinimicrobia	599043	573317	0	573317	31	100
Candidatus Melainabacteria bacterium GWF2_37_15	Bacteria; Terrabacteria group; Cyanobacteria/Melainabacteria group; Candidatus Melainabacteria; unclassified Melainabacteria	2265812	2265812	0	2265812	102	100
Nitrospirae bacterium GWC2_57_13	Bacteria; Nitrospirae; unclassified Nitrospirae	3319930	3319930	0	3319930	105	100
Methylocapsa acidiphila B2	Bacteria; Proteobacteria; Alphaproteobacteria; Rhizobiales; Beijerinckiaceae; Methylocapsa; Methylocapsa acidiphila	4103433	4103433	0	4103433	42	100
Cucumibacter marinus DSM 18995	Bacteria; Proteobacteria; Alphaproteobacteria; Rhizobiales; Hyphomicrobiaceae; Cucumibacter; Cucumibacter marinus	3713661	3708389	0	3708389	20	100
Hoeflea phototrophica DFL-43	Bacteria; Proteobacteria; Alphaproteobacteria; Rhizobiales; Phyllobacteriaceae; Hoeflea; Hoeflea phototrophica	4468465	4468465	0	4468465	45	100
Vasilyevaea enhydra strain ATCC 23634	Bacteria; Proteobacteria; Alphaproteobacteria; Rhizobiales; Hyphomicrobiaceae; Devosia	4221709	4219253	0	4219253	44	100
Rhodobacteraceae bacterium CG2_30_10_405	Bacteria; Proteobacteria; Alphaproteobacteria; Rhodobacterales; Rhodobacteraceae; unclassified Rhodobacteraceae	2045404	947822	0	947822	200	100
Phaeobacter gallaeciensis 2.10	Bacteria; Proteobacteria; Alphaproteobacteria; Rhodobacterales; Rhodobacteraceae; Phaeobacter; Phaeobacter inhibens	3758274	3758274	0	3758274	38	100
Skermanella stibiiresistens SB22	Bacteria; Proteobacteria; Alphaproteobacteria; Rhodospirillales; Rhodospirillaceae; Skermanella; Skermanella stibiiresistens	7868338	7809940	0	7809940	87	100
Blastomonas sp. AAP53	Bacteria; Proteobacteria; Alphaproteobacteria; Sphingomonadales; Sphingomonadaceae; Blastomonas	7232432	7222002	0	7222002	48	100
Candidatus Glomeribacter Glomeribacter sp. 1016415	Bacteria; Proteobacteria; Betaproteobacteria; Burkholderiales; Burkholderiaceae	2637642	2635192	0	2635192	31	100
Nitrosospira multiformis ATCC 25196	Bacteria; Proteobacteria; Betaproteobacteria; Nitrosomonadales; Nitrosomonadaceae; Nitrosospira; Nitrosospira multiformis	3184243	3184243	0	3184243	32	100
Desulfocapsa sulfexigens DSM 10523	Bacteria; Proteobacteria; delta/epsilon subdivisions; Deltaproteobacteria; Desulfobacterales; Desulfobulbaceae; Desulfocapsa; Desulfocapsa sulfexigens	3986761	3986761	0	3986761	40	100
Cardiobacterium valvarum F0432	Bacteria; Proteobacteria; Gammaproteobacteria; Cardiobacteriales; Cardiobacteriaceae; Cardiobacterium; Cardiobacterium valvarum	2553535	2526218	0	2526218	76	100
Nitrococcus mobilis Nb-231	Bacteria; Proteobacteria; Gammaproteobacteria; Chromatiales; Ectothiorhodospiraceae; Nitrococcus; Nitrococcus mobilis	3623681	3613155	0	3613155	37	100
Erwinia amylovora CFBP1430	Bacteria; Proteobacteria; Gammaproteobacteria; Enterobacterales; Erwiniaceae; Erwinia; Erwinia amylovora	3805573	3805573	0	3805573	39	100
Marinomonas mediterranea MMB-1	Bacteria; Proteobacteria; Gammaproteobacteria; Oceanospirillales; Oceanospirillaceae; Marinomonas; Marinomonas mediterranea	4684316	4684316	0	4684316	47	100
Psychrobacter cryohalolentis K5	Bacteria; Proteobacteria; Gammaproteobacteria; Pseudomonadales; Moraxellaceae; Psychrobacter; Psychrobacter cryohalolentis	3059876	3059876	0	3059876	31	100
Congregibacter litoralis KT71	Bacteria; Proteobacteria; Gammaproteobacteria; Cellvibrionales; Halieaceae; Congregibacter; Congregibacter litoralis	4351117	4351117	0	4351117	44	100
Wohlfahrtiimonas chitiniclastica strain BM-Y	Bacteria; Proteobacteria; Gammaproteobacteria; unclassified Gammaproteobacteria; Wohlfahrtiimonas	2181980	2181980	0	2181980	23	100
Salinispira pacifica strain L21-RPul-D2	Bacteria; Spirochaetes; Spirochaetia; Spirochaetales; Spirochaetaceae; Salinispira	3782798	3782798	0	3782798	38	100
Dethiosulfovibrio peptidovorans DSM 11002	Bacteria; Synergistetes; Synergistia; Synergistales; Synergistaceae; Dethiosulfovibrio; Dethiosulfovibrio peptidovorans	2576359	2574851	0	2574851	27	100
Thermodesulfobacterium hveragerdense DSM 12571	Bacteria; Thermodesulfobacteria; Thermodesulfobacteria; Thermodesulfobacteriales; Thermodesulfobacteriaceae; Thermodesulfobacterium; Thermodesulfobacterium hveragerdense	1729593	1718128	0	1718128	35	100
Kosmotoga olearia TBF 19.5.1	Bacteria; Thermotogae; Thermotogae; Kosmotogales; Kosmotogaceae; Kosmotoga; Kosmotoga olearia	2302126	2300000	0	2300000	23	100
Atribacteria bacterium SCGC AAA255-E04	Bacteria; unclassified Bacteria; Bacteria candidate phyla; Candidatus Atribacteria; unclassified Atribacteria	152628	144085	0	144085	17	100
Berkelbacteria bacterium GW2011_GWA1_36_9 US31_C0001	Bacteria; unclassified Bacteria; Bacteria candidate phyla; Candidatus Berkelbacteria	861834	861834	0	861834	30	100
Candidatus Falkowbacteria bacterium GW2011_GWC2_38_22 US83_C0001	Bacteria; unclassified Bacteria; Bacteria candidate phyla; Patescibacteria group; Parcubacteria group; Candidatus Falkowbacteria	1387850	1382811	0	1382811	20	100
Candidate division WS6 bacterium GW2011_GWF2_39_15 UT34_C0001	Bacteria; unclassified Bacteria; Bacteria candidate phyla; Candidatus Dojkabacteria	899311	899311	0	899311	10	100
Candidatus Giovannonibacteria bacterium GW2011_GWC2_44_9 UW81_C0001	Bacteria; unclassified Bacteria; Bacteria candidate phyla; Patescibacteria group; Parcubacteria group; Candidatus Giovannonibacteria	745743	745743	0	745743	42	100
Candidatus Azambacteria bacterium GW2011_GWD2_46_48 UX56_C0001	Bacteria; unclassified Bacteria; Bacteria candidate phyla; Patescibacteria group; Parcubacteria group; Candidatus Azambacteria	572759	572759	0	572759	54	100
Candidate division Kazan bacterium GW2011_GWC1_52_13 VE99_C0001	Bacteria; unclassified Bacteria; Bacteria candidate phyla; candidate division Kazan-3B-28	760397	758840	0	758840	11	100
Candidate division WOR-1 bacterium RIFOXYB2_FULL_36_35	Bacteria; unclassified Bacteria; Bacteria candidate phyla; candidate division WOR-1	1951288	1951288	0	1951288	67	100
Candidate division WWE3 bacterium RIFCSPHIGHO2_12_FULL_38_15	Bacteria; unclassified Bacteria; Bacteria candidate phyla; candidate division WWE3	963567	963567	0	963567	22	100
Candidatus Adlerbacteria bacterium RIFCSPHIGHO2_12_FULL_53_18	Bacteria; unclassified Bacteria; Bacteria candidate phyla; Patescibacteria group; Parcubacteria group; Candidatus Adlerbacteria	539999	539999	0	539999	18	100
Candidatus Daviesbacteria bacterium RIFCSPLOWO2_01_FULL_39_23	Bacteria; unclassified Bacteria; Bacteria candidate phyla; Patescibacteria group; Microgenomates group; Candidatus Daviesbacteria	1278683	1278683	0	1278683	15	100
Candidatus Brennerbacteria bacterium RIFOXYD1_FULL_41_16	Bacteria; unclassified Bacteria; Bacteria candidate phyla; Patescibacteria group; Parcubacteria group; Candidatus Brennerbacteria	655033	655033	0	655033	13	100
Candidatus Komeilibacteria bacterium RIFOXYD1_FULL_37_29	Bacteria; unclassified Bacteria; Bacteria candidate phyla; Patescibacteria group; Parcubacteria group; Candidatus Komeilibacteria	899340	899340	0	899340	12	100
Candidatus Liptonbacteria bacterium RIFCSPHIGHO2_01_FULL_57_28	Bacteria; unclassified Bacteria; Bacteria candidate phyla; Patescibacteria group; Parcubacteria group; Candidatus Liptonbacteria	553409	553409	0	553409	33	100
CG_4_10_14_0_8_um_filter_cor_CG_Falkow_02_36_39	Bacteria; unclassified Bacteria; Bacteria candidate phyla; Patescibacteria group; Parcubacteria group; Candidatus Falkowbacteria	1071771	1028469	0	1028469	109	100
CG_4_10_14_0_8_um_filter_cor_CG_Nomura_04_47_645		793338	793338	0	793338	48	100
Coxiella burnetii RSA 493	Bacteria; Proteobacteria; Gammaproteobacteria; Legionellales; Coxiellaceae; Coxiella; Coxiella burnetii	2032674	2032674	0	2032674	21	100
Mycoplasma penetrans HF-2	Bacteria; Terrabacteria group; Tenericutes; Mollicutes; Mycoplasmatales; Mycoplasmataceae; Mycoplasma; Mycoplasma penetrans	1358633	1358633	0	1358633	14	100
Ruegeria pomeroyi DSS-3	Bacteria; Proteobacteria; Alphaproteobacteria; Rhodobacterales; Rhodobacteraceae; Ruegeria; Ruegeria pomeroyi	4601048	4601048	0	4601048	47	100
Clostridium novyi NT	Bacteria; Terrabacteria group; Firmicutes; Clostridia; Clostridiales; Clostridiaceae; Clostridium; Clostridium novyi	2547720	2547720	0	2547720	26	100
Alkalilimnicola ehrlichii MLHE-1	Bacteria; Proteobacteria; Gammaproteobacteria; Chromatiales; Ectothiorhodospiraceae; Alkalilimnicola; Alkalilimnicola ehrlichii	3275944	3275944	0	3275944	33	100
Coxiella burnetii Dugway 5J108-111	Bacteria; Proteobacteria; Gammaproteobacteria; Legionellales; Coxiellaceae; Coxiella; Coxiella burnetii	2212937	2212937	0	2212937	23	100
Desulfobacterium autotrophicum HRM2	Bacteria; Proteobacteria; delta/epsilon subdivisions; Deltaproteobacteria; Desulfobacterales; Desulfobacteraceae; Desulfobacterium; Desulfobacterium autotrophicum	5657782	5657782	0	5657782	57	100
Thermosipho africanus TCF52B	Bacteria; Thermotogae; Thermotogae; Thermotogales; Fervidobacteriaceae; Thermosipho; Thermosipho africanus	2016657	2016657	0	2016657	21	100
Clostridium botulinum A2 str. Kyoto	Bacteria; Terrabacteria group; Firmicutes; Clostridia; Clostridiales; Clostridiaceae; Clostridium; Clostridium botulinum; Clostridium botulinum A	4155278	4155278	0	4155278	42	100
Yersinia pseudotuberculosis IP32953	Bacteria; Proteobacteria; Gammaproteobacteria; Enterobacterales; Yersiniaceae; Yersinia; Yersinia pseudotuberculosis complex; Yersinia pseudotuberculosis	4840898	4840898	0	4840898	50	100
Methylotenera versatilis 301	Bacteria; Proteobacteria; Betaproteobacteria; Methylophilales; Methylophilaceae; Methylotenera; Methylotenera versatilis	3059871	3059871	0	3059871	31	100
Lactobacillus paracasei subsp. paracasei 8700:2	Bacteria; Terrabacteria group; Firmicutes; Bacilli; Lactobacillales; Lactobacillaceae; Lactobacillus; Lactobacillus casei group; Lactobacillus paracasei; Lactobacillus paracasei subsp. paracasei	3025352	3025352	0	3025352	32	100
Desulfurispirillum indicum S5	Bacteria; Chrysiogenetes; Chrysiogenetes; Chrysiogenales; Chrysiogenaceae; Desulfurispirillum; Desulfurispirillum indicum	2928377	2928377	0	2928377	30	100
Desulfurobacterium thermolithotrophum DSM 11699	Bacteria; Aquificae; Aquificae; Desulfurobacteriales; Desulfurobacteriaceae; Desulfurobacterium; Desulfurobacterium thermolithotrophum	1541968	1541968	0	1541968	16	100
Acidiphilium multivorum AIU301 DNA	Bacteria; Proteobacteria; Alphaproteobacteria; Rhodospirillales; Acetobacteraceae; Acidiphilium; Acidiphilium multivorum	4214744	4213015	0	4213015	47	100
Aeromonas veronii B565	Bacteria; Proteobacteria; Gammaproteobacteria; Aeromonadales; Aeromonadaceae; Aeromonas; Aeromonas veronii	4551783	4551783	0	4551783	46	100
Serratia sp. AS13	Bacteria; Proteobacteria; Gammaproteobacteria; Enterobacterales; Yersiniaceae; Serratia	5442549	5442549	0	5442549	55	100
Thioalkalimicrobium cyclicum ALM1	Bacteria; Proteobacteria; Gammaproteobacteria; Thiotrichales; Piscirickettsiaceae; Thioalkalimicrobium; Thioalkalimicrobium cyclicum	1932455	1932455	0	1932455	20	100
Streptococcus mutans GS-5	Bacteria; Terrabacteria group; Firmicutes; Bacilli; Lactobacillales; Streptococcaceae; Streptococcus; Streptococcus mutans	2027088	2027088	0	2027088	21	100
Bradyrhizobium sp. CCGE-LA001	Bacteria; Proteobacteria; Alphaproteobacteria; Rhizobiales; Bradyrhizobiaceae; Bradyrhizobium	7833499	7833499	0	7833499	79	100
Rivularia sp. PCC 7116	Bacteria; Terrabacteria group; Cyanobacteria/Melainabacteria group; Cyanobacteria; Nostocales; Rivulariaceae; Rivularia	8728773	8728773	0	8728773	89	100
Candidatus Endolissoclinum faulkneri L2	Bacteria; Proteobacteria; Alphaproteobacteria; Rhodospirillales; Rhodospirillaceae; Candidatus Endolissoclinum; Candidatus Endolissoclinum faulkneri	1481191	1481191	0	1481191	15	100
Bifidobacterium thermophilum RBL67	Bacteria; Terrabacteria group; Actinobacteria; Actinobacteria; Bifidobacteriales; Bifidobacteriaceae; Bifidobacterium; Bifidobacterium thermophilum	2291643	2291643	0	2291643	23	100
Corynebacterium glutamicum SCgG2	Bacteria; Terrabacteria group; Actinobacteria; Actinobacteria; Corynebacteriales; Corynebacteriaceae; Corynebacterium; Corynebacterium glutamicum	3350619	3350619	0	3350619	34	100
Candidatus Liberibacter americanus str. Sao Paulo	Bacteria; Proteobacteria; Alphaproteobacteria; Rhizobiales; Rhizobiaceae; Liberibacter; Candidatus Liberibacter americanus	1195201	1195201	0	1195201	12	100
Candidatus Endolissoclinum faulkneri L5	Bacteria; Proteobacteria; Alphaproteobacteria; Rhodospirillales; Rhodospirillaceae; Candidatus Endolissoclinum; Candidatus Endolissoclinum faulkneri	1518636	1518636	0	1518636	16	100
Vibrio parahaemolyticus UCM-V493	Bacteria; Proteobacteria; Gammaproteobacteria; Vibrionales; Vibrionaceae; Vibrio; Vibrio harveyi group; Vibrio parahaemolyticus	5232572	5232572	0	5232572	53	100
Paenibacillus sabinae T27	Bacteria; Terrabacteria group; Firmicutes; Bacilli; Bacillales; Paenibacillaceae; Paenibacillus; Paenibacillus sabinae	5270569	5270569	0	5270569	53	100
Castellaniella defragrans 65Phen	Bacteria; Proteobacteria; Betaproteobacteria; Burkholderiales; Alcaligenaceae; Castellaniella; Castellaniella defragrans	3952818	3952818	0	3952818	40	100
Corynebacterium glyciniphilum AJ 3170	Bacteria; Terrabacteria group; Actinobacteria; Actinobacteria; Corynebacteriales; Corynebacteriaceae; Corynebacterium; Corynebacterium glyciniphilum	3568218	3568218	0	3568218	37	100
Streptococcus iniae strain ISET0901	Bacteria; Terrabacteria group; Firmicutes; Bacilli; Lactobacillales; Streptococcaceae; Streptococcus	2070822	2070822	0	2070822	21	100
Burkholderia thailandensis USAMRU Malaysia	Bacteria; Proteobacteria; Betaproteobacteria; Burkholderiales; Burkholderiaceae; Burkholderia; pseudomallei group	6684359	6684359	0	6684359	68	100
Pectobacterium atrosepticum strain 21A	Bacteria; Proteobacteria; Gammaproteobacteria; Enterobacterales; Pectobacteriaceae; Pectobacterium	5024250	5024250	0	5024250	51	100
Pseudomonas alkylphenolia strain KL28	Bacteria; Proteobacteria; Gammaproteobacteria; Pseudomonadales; Pseudomonadaceae; Pseudomonas	5764622	5764622	0	5764622	58	100
Ornithobacterium rhinotracheale ORT-UMN 88	Bacteria; FCB group; Bacteroidetes/Chlorobi group; Bacteroidetes; Flavobacteriia; Flavobacteriales; Flavobacteriaceae; Ornithobacterium; Ornithobacterium rhinotracheale	2397867	2397867	0	2397867	24	100
Corynebacterium doosanense CAU 212 = DSM 45436	Bacteria; Terrabacteria group; Actinobacteria; Actinobacteria; Corynebacteriales; Corynebacteriaceae; Corynebacterium; Corynebacterium doosanense	2698995	2698995	0	2698995	28	100
Francisella tularensis subsp. holarctica strain FTT_1	Bacteria; Proteobacteria; Gammaproteobacteria; Thiotrichales; Francisellaceae; Francisella	1892782	1892782	0	1892782	19	100
Pseudomonas fluorescens strain PCL1751	Bacteria; Proteobacteria; Gammaproteobacteria; Pseudomonadales; Pseudomonadaceae; Pseudomonas; Pseudomonas fluorescens group	6143950	6143950	0	6143950	62	100
Xanthomonas campestris strain 17	Bacteria; Proteobacteria; Gammaproteobacteria; Xanthomonadales; Xanthomonadaceae; Xanthomonas	5254865	5254865	0	5254865	53	100
Corynebacterium kutscheri strain DSM 20755	Bacteria; Terrabacteria group; Actinobacteria; Actinobacteria; Corynebacteriales; Corynebacteriaceae; Corynebacterium	2354065	2354065	0	2354065	24	100
Streptomyces leeuwenhoekii genome assembly sleC34	Bacteria; Terrabacteria group; Actinobacteria; Actinobacteria; Streptomycetales; Streptomycetaceae; Streptomyces	8122491	8122491	0	8122491	83	100
Aggregatibacter aphrophilus NJ8700	Bacteria; Proteobacteria; Gammaproteobacteria; Pasteurellales; Pasteurellaceae; Aggregatibacter; Aggregatibacter aphrophilus	2313256	2313256	0	2313256	24	100
Moorella thermoacetica strain DSM 521	Bacteria; Terrabacteria group; Firmicutes; Clostridia; Thermoanaerobacterales; Thermoanaerobacteraceae; Moorella group; Moorella	2527564	2527564	0	2527564	26	100
Pseudonocardia sp. EC080619-01	Bacteria; Terrabacteria group; Actinobacteria; Actinobacteria; Pseudonocardiales; Pseudonocardiaceae; Pseudonocardia	7205934	7205934	0	7205934	74	100
Marinobacter sp. LQ44	Bacteria; Proteobacteria; Gammaproteobacteria; Alteromonadales; Alteromonadaceae; Marinobacter	4435564	4435564	0	4435564	45	100
Gammaproteobacteria bacterium NRL1	Bacteria; Proteobacteria; Gammaproteobacteria; Chromatiales; Chromatiaceae; Candidatus Tenderia	3763866	3763866	0	3763866	39	100
Vibrio fluvialis strain ATCC 33809	Bacteria; Proteobacteria; Gammaproteobacteria; Vibrionales; Vibrionaceae; Vibrio	4827724	4827724	0	4827724	49	100
Enterobacter aerogenes strain G7	Bacteria; Proteobacteria; Gammaproteobacteria; Enterobacterales; Enterobacteriaceae; Klebsiella	5626434	5626434	0	5626434	57	100
Shigella flexneri 1a strain 0228	Bacteria; Proteobacteria; Gammaproteobacteria; Enterobacterales; Enterobacteriaceae; Shigella	4853344	4853344	0	4853344	51	100
Francisella persica ATCC VR-331	Bacteria; Proteobacteria; Gammaproteobacteria; Thiotrichales; Francisellaceae; Francisella; Francisella persica	1540768	1540768	0	1540768	16	100
Corynebacterium glutamicum ZL-6	Bacteria; Terrabacteria group; Actinobacteria; Actinobacteria; Corynebacteriales; Corynebacteriaceae; Corynebacterium; Corynebacterium glutamicum	3332458	3332458	0	3332458	34	100
Aeromonas hydrophila strain AHNIH1	Bacteria; Proteobacteria; Gammaproteobacteria; Aeromonadales; Aeromonadaceae; Aeromonas	5049466	5049466	0	5049466	52	100
Vibrio coralliilyticus strain 58	Bacteria; Proteobacteria; Gammaproteobacteria; Vibrionales; Vibrionaceae; Vibrio	5490011	5490011	0	5490011	57	100
Neisseria meningitidis strain M22748	Bacteria; Proteobacteria; Betaproteobacteria; Neisseriales; Neisseriaceae; Neisseria; Neisseria meningitidis	2157503	2157503	0	2157503	22	100
Brochothrix thermosphacta strain TMW 2.1564	Bacteria; Terrabacteria group; Firmicutes; Bacilli; Bacillales; Listeriaceae; Brochothrix	2578375	2578375	0	2578375	27	100
Archaeon GW2011_AR5 QT00_C0001	Archaea; unclassified Archaea; unclassified Archaea (miscellaneous)	858244	858244	0	858244	10	100
Archaeon GW2011_AR10	Archaea; unclassified Archaea; unclassified Archaea (miscellaneous)	1241428	1241428	0	1241428	13	100
Archaeon GW2011_AR21 QT12_C0001	Archaea; unclassified Archaea; unclassified Archaea (miscellaneous)	362948	362948	0	362948	36	100
Archaeon GW2011_AR15	Archaea; unclassified Archaea; unclassified Archaea (miscellaneous)	1157790	1157790	0	1157790	12	100
Archaeon GW2011_AR18 QT09_C0001	Archaea; unclassified Archaea; unclassified Archaea (miscellaneous)	822540	822540	0	822540	17	100
Archaeon GW2011_AR20	Archaea; unclassified Archaea; unclassified Archaea (miscellaneous)	829411	829411	0	829411	9	100
Archaeon GW2011_AR3 QS98_C0001	Archaea; unclassified Archaea; unclassified Archaea (miscellaneous)	992621	992621	0	992621	14	100
Archaeon GW2011_AR9 QT02_C0001	Archaea; unclassified Archaea; unclassified Archaea (miscellaneous)	486555	486555	0	486555	12	100
Ferroglobus placidus DSM 10642	Archaea; Euryarchaeota; Archaeoglobi; Archaeoglobales; Archaeoglobaceae; Ferroglobus; Ferroglobus placidus	2196266	2196266	0	2196266	22	100
Halalkalicoccus jeotgali B3	Archaea; Euryarchaeota; Halobacteria; Halobacteriales; Halobacteriaceae; Halalkalicoccus; Halalkalicoccus jeotgali	2809118	2809118	0	2809118	29	100
Haloarcula marismortui ATCC 43049	Archaea; Euryarchaeota; Halobacteria; Halobacteriales; Haloarculaceae; Haloarcula; Haloarcula marismortui	3131724	3131724	0	3131724	32	100
Candidatus Halobonum tyrrellensis G22	Archaea; Euryarchaeota; Halobacteria; Halobacteriales; unclassified Halobacteriales; Candidatus Halobonum; Candidatus Halobonum tyrrellensis	3675087	3663192	0	3663192	59	100
archaeon A07HN63	Archaea; environmental samples	2392686	2375761	0	2375761	29	100
Haloplanus natans DSM 17983	Archaea; Euryarchaeota; Halobacteria; Haloferacales; Haloferacaceae; Haloplanus; Haloplanus natans	3797935	3795006	0	3795006	43	100
Halorhabdus utahensis DSM 12940	Archaea; Euryarchaeota; Halobacteria; Halobacteriales; Haloarculaceae; Halorhabdus; Halorhabdus utahensis	3116795	3116795	0	3116795	32	100
Halosimplex carlsbadense 2-9-1 strain 2/9/2001	Archaea; Euryarchaeota; Halobacteria; Halobacteriales; Haloarculaceae; Halosimplex	4694889	4685525	0	4685525	38	100
Halostagnicola larsenii XH-48	Archaea; Euryarchaeota; Halobacteria; Natrialbales; Natrialbaceae; Halostagnicola; Halostagnicola larsenii	4131176	4131176	0	4131176	43	100
Halophilic archaeon DL31	Archaea; unclassified Archaea; unclassified Archaea (miscellaneous)	2913689	2913689	0	2913689	30	100
Methanocaldococcus jannaschii DSM 2661	Archaea; Euryarchaeota; Methanococci; Methanococcales; Methanocaldococcaceae; Methanocaldococcus; Methanocaldococcus jannaschii	1664970	1664970	0	1664970	17	100
Methanotorris igneus Kol 5	Archaea; Euryarchaeota; Methanococci; Methanococcales; Methanocaldococcaceae; Methanotorris; Methanotorris igneus	1854197	1854197	0	1854197	19	100
Methanofollis liminatans DSM 4140	Archaea; Euryarchaeota; Methanomicrobia; Methanomicrobiales; Methanomicrobiaceae; Methanofollis; Methanofollis liminatans	2475100	2475100	0	2475100	25	100
Methanomicrobium mobile BP	Archaea; Euryarchaeota; Methanomicrobia; Methanomicrobiales; Methanomicrobiaceae; Methanomicrobium; Methanomicrobium mobile	1711791	1704168	0	1704168	8	100
Candidatus Methanosphaerula palustris E1-9c	Archaea; Euryarchaeota; Methanomicrobia; Methanomicrobiales; Methanoregulaceae; Methanosphaerula; Methanosphaerula palustris	2922917	2922917	0	2922917	30	100
Methanolinea tarda NOBI-1	Archaea; Euryarchaeota; Methanomicrobia; Methanomicrobiales; Methanoregulaceae; Methanolinea; Methanolinea tarda	2052856	2052856	0	2052856	21	100
Methanospirillum hungatei JF-1	Archaea; Euryarchaeota; Methanomicrobia; Methanomicrobiales; Methanospirillaceae; Methanospirillum; Methanospirillum hungatei	3544738	3544738	0	3544738	36	100
Candidatus Methanoperedens nitroreducens strain ANME-2d	Archaea; Euryarchaeota; Methanomicrobia; Methanosarcinales; Candidatus Methanoperedenaceae; Candidatus Methanoperedens	3203386	3203386	0	3203386	10	100
Palaeococcus pacificus DY20341	Archaea; Euryarchaeota; Thermococci; Thermococcales; Thermococcaceae; Palaeococcus; Palaeococcus pacificus	1859370	1859370	0	1859370	19	100
Thermococcus kodakarensis KOD1	Archaea; Euryarchaeota; Thermococci; Thermococcales; Thermococcaceae; Thermococcus; Thermococcus kodakarensis	2088737	2088737	0	2088737	21	100
Thermoplasma acidophilum DSM 1728	Archaea; Euryarchaeota; Thermoplasmata; Thermoplasmatales; Thermoplasmataceae; Thermoplasma; Thermoplasma acidophilum	1564906	1564906	0	1564906	16	100
Aciduliprofundum boonei T469	Archaea; Euryarchaeota; unclassified Euryarchaeota; DHVE2 group; Aciduliprofundum; Aciduliprofundum boonei	1486778	1486778	0	1486778	15	100
ARMAN2_1		1010785	1010129	0	1010129	14	100
UNLEPL_1		1660504	1660504	0	1660504	22	100
Methanosarcina acetivorans str. C2A	Archaea; Euryarchaeota; Methanomicrobia; Methanosarcinales; Methanosarcinaceae; Methanosarcina; Methanosarcina acetivorans	5751492	5751492	0	5751492	58	100
Sulfolobus tokodaii str. 7	Archaea; TACK group; Crenarchaeota; Thermoprotei; Sulfolobales; Sulfolobaceae; Sulfolobus; Sulfolobus tokodaii	2694756	2694756	0	2694756	27	100
Pyrobaculum islandicum DSM 4184	Archaea; TACK group; Crenarchaeota; Thermoprotei; Thermoproteales; Thermoproteaceae; Pyrobaculum; Pyrobaculum islandicum	1826402	1826402	0	1826402	19	100
Staphylothermus marinus F1	Archaea; TACK group; Crenarchaeota; Thermoprotei; Desulfurococcales; Desulfurococcaceae; Staphylothermus; Staphylothermus marinus	1570485	1570485	0	1570485	16	100
Archaeoglobus profundus DSM 5631	Archaea; Euryarchaeota; Archaeoglobi; Archaeoglobales; Archaeoglobaceae; Archaeoglobus; Archaeoglobus profundus	1563423	1560622	0	1560622	16	100
Ferroglobus placidus DSM 10642	Archaea; Euryarchaeota; Archaeoglobi; Archaeoglobales; Archaeoglobaceae; Ferroglobus; Ferroglobus placidus	2196266	2196266	0	2196266	22	100
Methanocaldococcus sp. FS406-22	Archaea; Euryarchaeota; Methanococci; Methanococcales; Methanocaldococcaceae; Methanocaldococcus	1773136	1773136	0	1773136	19	100
Aciduliprofundum boonei T469	Archaea; Euryarchaeota; unclassified Euryarchaeota; DHVE2 group; Aciduliprofundum; Aciduliprofundum boonei	1486778	1486778	0	1486778	15	100
Haloferax volcanii DS2	Archaea; Euryarchaeota; Halobacteria; Haloferacales; Haloferacaceae; Haloferax	4012900	4012900	0	4012900	43	100
Halalkalicoccus jeotgali B3	Archaea; Euryarchaeota; Halobacteria; Halobacteriales; Halobacteriaceae; Halalkalicoccus; Halalkalicoccus jeotgali	3698650	3698650	0	3698650	42	100
Pyrococcus sp. NA2	Archaea; Euryarchaeota; Thermococci; Thermococcales; Thermococcaceae; Pyrococcus	1861320	1861320	0	1861320	19	100
Methanosalsum zhilinae DSM 4017	Archaea; Euryarchaeota; Methanomicrobia; Methanosarcinales; Methanosarcinaceae; Methanosalsum; Methanosalsum zhilinae	2138444	2138444	0	2138444	22	100
Thermoproteus tenax Kra 1	Archaea; TACK group; Crenarchaeota; Thermoprotei; Thermoproteales; Thermoproteaceae; Thermoproteus; Thermoproteus tenax	1841542	1841542	0	1841542	19	100
Pyrococcus sp. ST04	Archaea; Euryarchaeota; Thermococci; Thermococcales; Thermococcaceae; Pyrococcus	1736885	1736885	0	1736885	18	100
Thermofilum sp. 1910b	Archaea; TACK group; Crenarchaeota; Thermoprotei; Thermoproteales; Thermofilaceae; Thermofilum	1750259	1750259	0	1750259	18	100
Methanobacterium sp. MB1	Archaea; Euryarchaeota; Methanobacteria; Methanobacteriales; Methanobacteriaceae; Methanobacterium	2029766	2029766	0	2029766	21	100
Palaeococcus pacificus DY20341	Archaea; Euryarchaeota; Thermococci; Thermococcales; Thermococcaceae; Palaeococcus; Palaeococcus pacificus	1859370	1859370	0	1859370	19	100
Methanothermobacter sp. CaT2	Archaea; Euryarchaeota; Methanobacteria; Methanobacteriales; Methanobacteriaceae; Methanothermobacter	1731018	1731018	0	1731018	19	100
Methanosarcina thermophila TM-1	Euryarchaeota; Methanomicrobia; Methanosarcinales; Methanosarcinaceae; Methanosarcina; Methanosarcina thermophila	3127379	3127379	0	3127379	32	100
Methanobrevibacter sp. YE315	Archaea; Euryarchaeota; Methanobacteria; Methanobacteriales; Methanobacteriaceae; Methanobrevibacter	2273296	2273296	0	2273296	23	100
Thermococcus peptonophilus strain OG-1	Archaea; Euryarchaeota; Thermococci; Thermococcales; Thermococcaceae; Thermococcus	1896106	1896106	0	1896106	20	100
UNLGPL_1		1827265	1822754	0	1822754	19	100
UNLIPL_1		1701569	1701569	0	1701569	22	100
ISOLFER1_1		1935211	1935211	0	1935211	20	100
Eukaryotes
Encephalitozoon romaleae	Eukaryota; Opisthokonta; Fungi; Microsporidia; Apansporoblastina; Unikaryonidae; Encephalitozoon	2187595	2187595	1204795	982800	13	55.074
Sterkiella histriomuscorum strain BA	Eukaryota; Alveolata; Ciliophora; Intramacronucleata; Spirotrichea; Stichotrichia; Sporadotrichida; Oxytrichidae; Stylonychinae; Sterkiella	66368609	30992396	20128894	10863502	6625	64.9478
Daphnia pulex	Eukaryota; Opisthokonta; Metazoa; Eumetazoa; Bilateria; Protostomia; Ecdysozoa; Panarthropoda; Arthropoda; Mandibulata; Pancrustacea; Crustacea; Branchiopoda; Phyllopoda; Diplostraca; Cladocera; Anomopoda; Daphniidae; Daphnia	197206209	194357273	164998312	29358961	3071	84.8943
Trimastix pyriformis	Eukaryota; unclassified eukaryotes; Paratrimastix	6795619	418475	355990	62485	102	85.0684
Phytophthora ramorum Pr102	Eukaryota; Stramenopiles; Oomycetes; Peronosporales; Phytophthora; unclassified Phytophthora	66652401	66113822	58784533	7329289	2350	88.9141
Nematostella vectensis	Eukaryota; Opisthokonta; Metazoa; Eumetazoa; Cnidaria; Anthozoa; Hexacorallia; Actiniaria; Edwardsiidae; Nematostella	356613585	352354671	315238909	37115762	8003	89.4664
Aurantiochytrium sp. T66	Eukaryota; Stramenopiles; Labyrinthulomycetes; Thraustochytriaceae; Aurantiochytrium; unclassified Aurantiochytrium	43429441	42406318	38871172	3535146	593	91.6636
Alexandrium tamarense	Eukaryota; Alveolata; Dinophyceae; Gonyaulacales; Gonyaulacaceae; Alexandrium	152072399	7738592	7111890	626702	2038	91.9016
Naegleria gruberi NEG-M	Eukaryota; Heterolobosea; Schizopyrenida; Vahlkampfiidae; Naegleria	65140751	46824744	43466426	3358318	1802	92.8279
Saprolegnia parasitica CBS 223.65	Eukaryota; Stramenopiles; Oomycetes; Saprolegniales; Saprolegniaceae; Saprolegnia; Saprolegnia parasitica	53131624	51778279	48154871	3623408	879	93.0021
Aureococcus anophagefferens CCMP1984	Eukaryota; Stramenopiles; Pelagophyceae; Pelagomonadales; Aureococcus	56660572	55965149	52275857	3689292	689	93.4079
Mastigamoeba balamuthi	Eukaryota; Amoebozoa; Archamoebae; Mastigamoebidae; Mastigamoeba	48593103	21122147	19879512	1242635	4069	94.1169
Volvox carteri	Eukaryota; Viridiplantae; Chlorophyta; Chlorophyceae; Chlamydomonadales; Volvocaceae; Volvox	137684403	136979074	129335789	7643285	2082	94.4201
Metarhizium robertsii	Eukaryota; Opisthokonta; Fungi; Dikarya; Ascomycota; saccharomyceta; Pezizomycotina; leotiomyceta; sordariomyceta; Sordariomycetes; Hypocreomycetidae; Hypocreales; Clavicipitaceae; Metarhizium	41656800	41633620	39326769	2306851	78	94.4592
Phanerochaete chrysosporium	Eukaryota; Opisthokonta; Fungi; Dikarya; Basidiomycota; Agaricomycotina; Agaricomycetes; Agaricomycetes incertae sedis; Polyporales; Phanerochaetaceae; Phanerochaete	35149519	35102716	33326112	1776604	200	94.9388
Coelastrella sp. M60	Eukaryota; Viridiplantae; Chlorophyta; Chlorophyceae; Sphaeropleales; Scenedesmaceae; Coelastrella	80221759	69535503	66100942	3434561	7936	95.0607
Citrus sinensis	Eukaryota; Viridiplantae; Streptophyta; Streptophytina; Embryophyta; Tracheophyta; Euphyllophyta; Spermatophyta; Magnoliophyta; Mesangiospermae; eudicotyledons; Gunneridae; Pentapetalae; rosids; malvids; Sapindales; Rutaceae; Aurantioideae; Citrus	327669411	323858728	308421534	15437194	669	95.2334
Lepisosteus oculatus	Eukaryota; Opisthokonta; Metazoa; Eumetazoa; Bilateria; Deuterostomia; Chordata; Craniata; Vertebrata; Gnathostomata; Teleostomi; Euteleostomi; Actinopterygii; Actinopteri; Neopterygii; Holostei; Semionotiformes; Lepisosteidae; Lepisosteus	945861706	944502612	906659288	37843324	1061	95.9933
Branchiostoma floridae	Eukaryota; Opisthokonta; Metazoa; Eumetazoa; Bilateria; Deuterostomia; Chordata; Cephalochordata; Branchiostomidae; Branchiostoma	563968368	535032479	513876615	21155864	3031	96.0459
Nosema ceranae	Eukaryota; Opisthokonta; Fungi; Microsporidia; Apansporoblastina; Nosematidae; Nosema	7860219	3874604	3724569	150035	451	96.1277
Emiliania huxleyi CCMP1516	Eukaryota; Haptophyceae; Isochrysidales; Noelaerhabdaceae; Emiliania; Emiliania huxleyi	210746021	164438718	158146827	6291891	3303	96.1737
Hebeloma cylindrosporum	Eukaryota; Opisthokonta; Fungi; Dikarya; Basidiomycota; Agaricomycotina; Agaricomycetes; Agaricomycetidae; Agaricales; Cortinariaceae; Hebeloma	38226047	38151173	36709253	1441920	133	96.2205
Monosiga brevicollis	Eukaryota; Opisthokonta; Choanoflagellida; Craspedida; Salpingoecidae; Monosiga	58941582	48375538	46569105	1806433	1451	96.2658
Acyrthosiphon pisum	Eukaryota; Opisthokonta; Metazoa; Eumetazoa; Bilateria; Protostomia; Ecdysozoa; Panarthropoda; Arthropoda; Mandibulata; Pancrustacea; Hexapoda; Insecta; Dicondylia; Pterygota; Neoptera; Paraneoptera; Hemiptera; Sternorrhyncha; Aphidomorpha; Aphidoidea; Aphididae; Aphidinae; Macrosiphini; Acyrthosiphon	602279578	549017080	528993738	20023342	11017	96.3529
Orpinomyces sp.	Eukaryota; Opisthokonta; Fungi; Neocallimastigomycota; Neocallimastigomycetes; Neocallimastigales; Neocallimastigaceae	100954185	59045750	57149673	1896077	12863	96.7888
Salpingoeca rosetta	Eukaryota; Opisthokonta; Choanoflagellida; Craspedida; Salpingoecidae; Salpingoeca	55440309	55410757	53663892	1746865	143	96.8474
Fomitopsis pinicola	Eukaryota; Opisthokonta; Fungi; Dikarya; Basidiomycota; Agaricomycotina; Agaricomycetes; Agaricomycetes incertae sedis; Polyporales; Fomitopsidaceae; Fomitopsis	41614358	41241734	40029897	1211837	304	97.0616
Cyberlindnera jadinii	Eukaryota; Opisthokonta; Fungi; Dikarya; Ascomycota; saccharomyceta; Saccharomycotina; Saccharomycetes; Saccharomycetales; Phaffomycetaceae; Cyberlindnera	14275310	13256221	12894370	361851	97	97.2703
Acanthamoeba castellanii	Eukaryota; Amoebozoa; Discosea; Longamoebia; Centramoebida; Acanthamoebidae; Acanthamoeba	34053418	34053418	33281801	771617	326	97.7341
Macaca mulatta	Eukaryota; Opisthokonta; Metazoa; Eumetazoa; Bilateria; Deuterostomia; Chordata; Craniata; Vertebrata; Gnathostomata; Teleostomi; Euteleostomi; Sarcopterygii; Dipnotetrapodomorpha; Tetrapoda; Amniota; Mammalia; Theria; Eutheria; Boreoeutheria; Euarchontoglires; Primates; Haplorrhini; Simiiformes; Catarrhini; Cercopithecoidea; Cercopithecidae; Cercopithecinae; Macaca	3236207768	2975125110	2913892570	61232540	20794	97.9418
Perkinsus marinus ATCC 50983	Eukaryota; Alveolata; Perkinsea; Perkinsida; Perkinsidae; Perkinsus; Perkinsus marinus	110240091	68954789	67622120	1332669	2455	98.0673
Anopheles gambiae PEST	Eukaryota; Opisthokonta; Metazoa; Eumetazoa; Bilateria; Protostomia; Ecdysozoa; Panarthropoda; Arthropoda; Mandibulata; Pancrustacea; Hexapoda; Insecta; Dicondylia; Pterygota; Neoptera; Holometabola; Diptera; Nematocera; Culicomorpha; Culicoidea; Culicidae; Anophelinae; Anopheles; Cellia; Pyretophorus; gambiae species complex; Anopheles gambiae	497950355	493908477	484530106	9378371	1375	98.1012
Macaca fascicularis	Eukaryota; Opisthokonta; Metazoa; Eumetazoa; Bilateria; Deuterostomia; Chordata; Craniata; Vertebrata; Gnathostomata; Teleostomi; Euteleostomi; Sarcopterygii; Dipnotetrapodomorpha; Tetrapoda; Amniota; Mammalia; Theria; Eutheria; Boreoeutheria; Euarchontoglires; Primates; Haplorrhini; Simiiformes; Catarrhini; Cercopithecoidea; Cercopithecidae; Cercopithecinae; Macaca	2946827162	2942524608	2887755438	54769170	4114	98.1387
Aspergillus fumigatus	Eukaryota; Opisthokonta; Fungi; Dikarya; Ascomycota; saccharomyceta; Pezizomycotina; leotiomyceta; Eurotiomycetes; Eurotiomycetidae; Eurotiales; Aspergillaceae; Aspergillus	29388377	29388377	28855253	533124	298	98.1859
Coemansia reversa	Eukaryota; Opisthokonta; Fungi; Zoopagomycota; Kickxellomycotina; Kickxellales; Kickxellaceae; Coemansia	21838014	21522691	21135140	387551	213	98.1993
Ceriporiopsis subvermispora	Eukaryota; Opisthokonta; Fungi; Dikarya; Basidiomycota; Agaricomycotina; Agaricomycetes; Agaricomycetes incertae sedis; Polyporales; Coriolaceae; Gelatoporia	38969816	38321059	37699542	621517	118	98.3781
Guillardia theta	Eukaryota; Cryptophyta; Pyrenomonadales; Geminigeraceae; Guillardia	87145349	87033502	85687733	1345769	611	98.4537
Punctularia strigosozonata	Eukaryota; Opisthokonta; Fungi; Dikarya; Basidiomycota; Agaricomycotina; Agaricomycetes; Agaricomycetes incertae sedis; Corticiales; Punctulariaceae; Punctularia	34171901	33937375	33463716	473659	98	98.6043
Entamoeba histolytica	Eukaryota; Amoebozoa; Archamoebae; Entamoebidae; Entamoeba	20835395	19588235	19336473	251762	742	98.7147
Thecamonas trahens ATCC 50062	Eukaryota; Apusozoa; Apusomonadidae; Thecamonas; Thecamonas trahens	28680627	28669596	28305716	363880	127	98.7308
Porphyridium purpureum	Eukaryota; Rhodophyta; Bangiophyceae; Porphyridiales; Porphyridiaceae; Porphyridium	19451899	18135074	17925202	209872	1228	98.8427
Rozella allomycis	Eukaryota; Opisthokonta; Fungi; Cryptomycota; Rozella	11859274	11117359	10996292	121067	410	98.911
Acidomyces richmondensis	Eukaryota; Opisthokonta; Fungi; Dikarya; Ascomycota; saccharomyceta; Pezizomycotina; leotiomyceta; dothideomyceta; Dothideomycetes; Dothideomycetes incertae sedis; Acidomyces	29883570	27652731	27434048	218683	1338	99.2092
Pyrenophora tritici-repentis	Eukaryota; Opisthokonta; Fungi; Dikarya; Ascomycota; saccharomyceta; Pezizomycotina; leotiomyceta; dothideomyceta; Dothideomycetes; Pleosporomycetidae; Pleosporales; Pleosporineae; Pleosporaceae; Pyrenophora	37840464	37840464	37551276	289188	47	99.2358
Coprinopsis cinerea strain okayama7130	Eukaryota; Opisthokonta; Fungi; Dikarya; Basidiomycota; Agaricomycotina; Agaricomycetes; Agaricomycetidae; Agaricales; Psathyrellaceae; Coprinopsis	55260592	40297279	39997739	299540	1062	99.2567
Sesamum indicum	Eukaryota; Viridiplantae; Streptophyta; Streptophytina; Embryophyta; Tracheophyta; Euphyllophyta; Spermatophyta; Magnoliophyta; Mesangiospermae; eudicotyledons; Gunneridae; Pentapetalae; asterids; lamiids; Lamiales; Pedaliaceae; Sesamum	274906174	268689918	266789707	1900211	710	99.2928
Septoria musiva	Eukaryota; Opisthokonta; Fungi; Dikarya; Ascomycota; saccharomyceta; Pezizomycotina; leotiomyceta; dothideomyceta; Dothideomycetes; Dothideomycetidae; Capnodiales; Mycosphaerellaceae; Sphaerulina	29352103	29288950	29115834	173116	45	99.4089
Picochlorum sp. SENEW3	Eukaryota; Viridiplantae; Chlorophyta; Trebouxiophyceae; Trebouxiophyceae incertae sedis; Picochlorum	13390658	12925760	12851491	74269	274	99.4254
Nectria haematococca	Eukaryota; Opisthokonta; Fungi; Dikarya; Ascomycota; saccharomyceta; Pezizomycotina; leotiomyceta; sordariomyceta; Sordariomycetes; Hypocreomycetidae; Hypocreales; Nectriaceae; Fusarium; Fusarium solani species complex	51286497	51285632	50992761	292871	208	99.4289
Parus major	Eukaryota; Opisthokonta; Metazoa; Eumetazoa; Bilateria; Deuterostomia; Chordata; Craniata; Vertebrata; Gnathostomata; Teleostomi; Euteleostomi; Sarcopterygii; Dipnotetrapodomorpha; Tetrapoda; Amniota; Sauropsida; Sauria; Archelosauria; Archosauria; Dinosauria; Saurischia; Theropoda; Coelurosauria; Aves; Neognathae; Passeriformes; Paridae; Parus	1020310768	1018947329	1013138431	5808898	708	99.4299
Phytophthora kernoviae strain CBS 122049	Eukaryota; Stramenopiles; Oomycetes; Peronosporales; Phytophthora	39481229	36445563	36240753	204810	1313	99.438
Trichomonas vaginalis	Eukaryota; Parabasalia; Trichomonadida; Trichomonadidae; Trichomonas	176420065	106656600	106096809	559791	3417	99.4751
Blastocystis hominis	Eukaryota; Stramenopiles; Blastocystis	25698649	19837584	19735607	101977	260	99.4859
Micromonas pusilla	Eukaryota; Viridiplantae; Chlorophyta; prasinophytes; Mamiellophyceae; Mamiellales; Mamiellaceae; Micromonas	21958260	21955534	21844367	111167	230	99.4937
Laccaria amethystina	Eukaryota; Opisthokonta; Fungi; Dikarya; Basidiomycota; Agaricomycotina; Agaricomycetes; Agaricomycetidae; Agaricales; Tricholomataceae; Laccaria	52581404	51881222	51641321	239901	915	99.5376
Rhizopus chinensis	Eukaryota; Opisthokonta; Fungi; Mucoromycota; Mucoromycotina; Mucorales; Mucorineae; Rhizopodaceae; Rhizopus; Rhizopus microsporus	45739792	43896468	43737778	158690	2143	99.6385
Macrophomina phaseolina	Eukaryota; Opisthokonta; Fungi; Dikarya; Ascomycota; saccharomyceta; Pezizomycotina; leotiomyceta; dothideomyceta; Dothideomycetes; Dothideomycetes incertae sedis; Botryosphaeriales; Botryosphaeriaceae; Macrophomina	48882845	48315873	48141260	174613	773	99.6386
Paramecium tetraurelia	Eukaryota; Alveolata; Ciliophora; Intramacronucleata; Oligohymenophorea; Peniculida; Parameciidae; Paramecium	72094543	71609168	71358441	250727	491	99.6499
Haemoproteus tartakovsky	Eukaryota; Alveolata; Apicomplexa; Aconoidasida; Haemosporida; Haemoproteidae; Haemoproteus	23209007	20972890	20899701	73189	1614	99.651
Bodo saltans	Eukaryota; Euglenozoa; Kinetoplastida; Bodonidae; Bodo	39864394	39197142	39081327	115815	1858	99.7045
Blastomyces dermatitidis	Eukaryota; Opisthokonta; Fungi; Dikarya; Ascomycota; saccharomyceta; Pezizomycotina; leotiomyceta; Eurotiomycetes; Eurotiomycetidae; Onygenales; Ajellomycetaceae; Blastomyces	75353942	75348996	75146292	202704	98	99.731
Bathycoccus sp. TOSAG39-1	Eukaryota; Viridiplantae; Chlorophyta; prasinophytes; Mamiellophyceae; Mamiellales; Bathycoccaceae; Bathycoccus	10057911	8538386	8517017	21369	688	99.7497
Podospora anserina	Eukaryota; Opisthokonta; Fungi; Dikarya; Ascomycota; saccharomyceta; Pezizomycotina; leotiomyceta; sordariomyceta; Sordariomycetes; Sordariomycetidae; Sordariales; Lasiosphaeriaceae; Podospora	35010595	35010595	34923435	87160	354	99.751
Caenorhabditis elegans	Eukaryota; Opisthokonta; Metazoa; Eumetazoa; Bilateria; Protostomia; Ecdysozoa; Nematoda; Chromadorea; Rhabditida; Rhabditoidea; Rhabditidae; Peloderinae; Caenorhabditis	141688843	111505535	111241532	264003	2241	99.7632
Dekkera bruxellensis	Eukaryota; Opisthokonta; Fungi; Dikarya; Ascomycota; saccharomyceta; Saccharomycotina; Saccharomycetes; Saccharomycetales; Pichiaceae; Brettanomyces	13385232	13311291	13286925	24366	37	99.817
Agaricus bisporus	Eukaryota; Opisthokonta; Fungi; Dikarya; Basidiomycota; Agaricomycotina; Agaricomycetes; Agaricomycetidae; Agaricales; Agaricaceae; Agaricus	30233745	30231165	30181080	50085	28	99.8343
Botryobasidium botryosum	Eukaryota; Opisthokonta; Fungi; Dikarya; Basidiomycota; Agaricomycotina; Agaricomycetes; Agaricomycetes incertae sedis; Cantharellales; Botryobasidiaceae; Botryobasidium	46674321	46501235	46440020	61215	259	99.8684
Mixia osmundae	Eukaryota; Opisthokonta; Fungi; Dikarya; Basidiomycota; Pucciniomycotina; Mixiomycetes; Mixiales; Mixiaceae; Mixia	13634488	13584439	13566845	17594	23	99.8705
Physarum polycephalum	Eukaryota; Amoebozoa; Mycetozoa; Myxogastria; Myxogastromycetidae; Physariida; Physaraceae; Physarum	166468136	162819108	162634204	184904	6081	99.8864
Hypoxylon sp. CI-4A	Eukaryota; Opisthokonta; Fungi; Dikarya; Ascomycota; saccharomyceta; Pezizomycotina; leotiomyceta; sordariomyceta; Sordariomycetes; Xylariomycetidae; Xylariales; Xylariaceae; Hypoxylon	37704138	36784764	36748211	36553	347	99.9006
Fibroporia radiculosa	Eukaryota; Opisthokonta; Fungi; Dikarya; Basidiomycota; Agaricomycotina; Agaricomycetes; Agaricomycetes incertae sedis; Polyporales; Polyporaceae; Fibroporia	28378039	28378039	28350611	27428	861	99.9033
Giardia lamblia ATCC 50803	Eukaryota; Fornicata; Diplomonadida; Hexamitidae; Giardiinae; Giardia; Giardia intestinalis	22230970	22058597	22038952	19645	127	99.9109
Calocera viscosa	Eukaryota; Opisthokonta; Fungi; Dikarya; Basidiomycota; Agaricomycotina; Dacrymycetes; Dacrymycetales; Dacrymycetaceae; Calocera	29097227	28973637	28948832	24805	147	99.9144
Brachypodium distachyon	Eukaryota; Viridiplantae; Streptophyta; Streptophytina; Embryophyta; Tracheophyta; Euphyllophyta; Spermatophyta; Magnoliophyta; Mesangiospermae; Liliopsida; Petrosaviidae; commelinids; Poales; Poaceae; BOP clade; Pooideae; Brachypodieae; Brachypodium	271997306	271991227	271776478	214749	24	99.921
Candida tanzawaensis	Eukaryota; Opisthokonta; Fungi; Dikarya; Ascomycota; saccharomyceta; Saccharomycotina; Saccharomycetes; Saccharomycetales; Debaryomycetaceae; Candida tanzawaensis clade	13136204	13128808	13123026	5782	12	99.956
Tetrahymena thermophila Macronucleus	Eukaryota; Alveolata; Ciliophora; Intramacronucleata; Oligohymenophorea; Hymenostomatida; Tetrahymenina; Tetrahymenidae; Tetrahymena; Tetrahymena thermophila	103014375	102277283	102233266	44017	581	99.957
Dothistroma septosporum	Eukaryota; Opisthokonta; Fungi; Dikarya; Ascomycota; saccharomyceta; Pezizomycotina; leotiomyceta; dothideomyceta; Dothideomycetes; Dothideomycetidae; Capnodiales; Mycosphaerellaceae; Dothistroma	30209431	30204215	30191644	12571	314	99.9584
Bigelowiella natans	Eukaryota; Rhizaria; Cercozoa; Chlorarachniophyceae; Bigelowiella	91405885	89824374	89791575	32799	2732	99.9635
Eutrema parvulum	Eukaryota; Viridiplantae; Streptophyta; Streptophytina; Embryophyta; Tracheophyta; Euphyllophyta; Spermatophyta; Magnoliophyta; Mesangiospermae; eudicotyledons; Gunneridae; Pentapetalae; rosids; malvids; Brassicales; Brassicaceae; Brassicaceae incertae sedis; Schrenkiella	137073209	136224699	136180794	43905	998	99.9678
Schizosaccharomyces cryophilus	Eukaryota; Opisthokonta; Fungi; Dikarya; Ascomycota; Taphrinomycotina; Schizosaccharomycetes; Schizosaccharomycetales; Schizosaccharomycetaceae; Schizosaccharomyces	11556809	11535800	11532462	3338	19	99.9711
Bassiana bassiana	Eukaryota; Opisthokonta; Fungi; Dikarya; Ascomycota; saccharomyceta; Pezizomycotina; leotiomyceta; sordariomyceta; Sordariomycetes; Hypocreomycetidae; Hypocreales; Cordycipitaceae; Beauveria	33693936	33582324	33578577	3747	161	99.9888
Leptomonas seymouri	Eukaryota; Euglenozoa; Kinetoplastida; Trypanosomatidae; Leishmaniinae; Leptomonas	27764161	27027614	27027614	0	721	100
Dictyostelium fasciculatum	Eukaryota; Amoebozoa; Mycetozoa; Dictyosteliida; Dictyostelium	31019208	31019208	31019208	0	325	100
Mucor cordense	Eukaryota; Opisthokonta; Fungi; Mucoromycota; Mucoromycotina; Mucorales; Mucorineae; Mucoraceae	36587022	36582130	36582130	0	381	100
Botryotinia fuckeliana	Fungi, Ascomycota, Pezizomycotina, Leotiomycetes, Leotiomycetidae, Helotiales, Sclerotiniaceae, Botryotinia	42630066	42630066	42630066	0	18	100
Pichia pastoris	Eukaryota; Opisthokonta; Fungi; Dikarya; Ascomycota; saccharomyceta; Saccharomycotina; Saccharomycetes; Saccharomycetales; Phaffomycetaceae; Komagataella	9216378	9216378	9216378	0	93	100
Penicillium oxalicum	Eukaryota; Opisthokonta; Fungi; Dikarya; Ascomycota; saccharomyceta; Pezizomycotina; leotiomyceta; Eurotiomycetes; Eurotiomycetidae; Eurotiales; Aspergillaceae; Penicillium	30177368	30177368	30177368	0	307	100
Trypanosomanbrucei	Eukaryota; Euglenozoa; Kinetoplastida; Trypanosomatidae; Trypanosoma; Trypanozoon	26075494	26075494	26075494	0	12	100
Cyanidioschyzon merolae	Eukaryota; Rhodophyta; Bangiophyceae; Cyanidiales; Cyanidiaceae; Cyanidioschyzon	16546747	16546747	16546747	0	20	100
Glarea lozoyensis	Eukaryota; Opisthokonta; Fungi; Dikarya; Ascomycota; saccharomyceta; Pezizomycotina; leotiomyceta; sordariomyceta; Leotiomycetes; Helotiales; Helotiaceae; Glarea	39509734	39509734	39509734	0	22	100
Coprinopsis cinerea	Eukaryota; Opisthokonta; Fungi; Dikarya; Basidiomycota; Agaricomycotina; Agaricomycetes; Agaricomycetidae; Agaricales; Psathyrellaceae; Coprinopsis	36294355	36279637	36279637	0	88	100
Ustilago maydis	Eukaryota; Opisthokonta; Fungi; Dikarya; Basidiomycota; Ustilaginomycotina; Ustilaginomycetes; Ustilaginales; Ustilaginaceae; Ustilago	19664356	19662145	19662145	0	26	100
Saccharomyces eubayanus	Eukaryota; Opisthokonta; Fungi; Dikarya; Ascomycota; saccharomyceta; Saccharomycotina; Saccharomycetes; Saccharomycetales; Saccharomycetaceae; Saccharomyces	11734173	11727673	11727673	0	21	100
Pleurotus ostreatus	Eukaryota; Opisthokonta; Fungi; Dikarya; Basidiomycota; Agaricomycotina; Agaricomycetes; Agaricomycetidae; Agaricales; Pleurotaceae; Pleurotus	34343005	34343005	34343005	0	12	100
Rhodosporidium toruloides	Eukaryota; Opisthokonta; Fungi; Dikarya; Basidiomycota; Pucciniomycotina; Microbotryomycetes; Sporidiobolales; Sporidiobolaceae; Rhodotorula	20223942	20174178	20174178	0	64	100
Sporotrichum thermophile	Eukaryota; Opisthokonta; Fungi; Dikarya; Ascomycota; saccharomyceta; Pezizomycotina; leotiomyceta; sordariomyceta; Sordariomycetes; Sordariomycetidae; Sordariales; Chaetomiaceae; Thermothelomyces	38744216	38744216	38744216	0	392	100
Unrepresented Phyla
Organism	Lineage	Total Genome Length	Genome length in contigs >3kb	Amount of sequence in fragmented 3kb chunks	Amount of sequence in fragmented 20kb chunks	Predicted Euk bps on unfragmented sequence	Predicted Euk bps on 3kb fragmented sequence	Predicted Euk bps on 20kb fragmented sequence	Prediction accuracy on unfragmented	Prediction accuracy on 3kb fragmentedf	Prediction accuracy on 20kb fragmented
Eukaryotes
Bigelowiella natans	Eukaryota; Rhizaria; Cercozoa; Chlorarachniophyceae; Bigelowiella	91405885	89824374	85911000	64600000	89794575	85281000	64600000	99.9668	99.2667	100
Physarum polycephalum strain LU352	Eukaryota; Amoebozoa; Mycetozoa; Myxogastria; Myxogastromycetidae; Physariida; Physaraceae; Physarum	205175886	171951237	161937000	113680000	163249631	151722000	113220000	94.9395	93.692	99.5954
Reticulomyxa filosa	Eukaryota; Rhizaria; Foraminifera; Monothalamids; Reticulomyxidae; Reticulomyxa	101867045	57203082	45807000	2400000	56794856	45351000	2400000	99.2864	99.0045	100
Vitrella brassicaformis	Eukaryota; Alveolata; Chromerida; Vitrella	72700666	72507543	71148000	63640000	72484990	71043000	63640000	99.9689	99.8524	100
Monocercomonoides sp. PA203	Eukaryota; Oxymonadida; Polymastigidae	74721868	74272873	71391000	56620000	74218874	69963000	56620000	99.9273	97.9997	100
Tritrichomonas foetus strain K	Eukaryota; Parabasalia; Tritrichomonadida; Tritrichomonadidae; Tritrichomonas	67585742	67359716	65463000	54200000	67176896	55101000	53840000	99.7286	84.1712	99.3358
Lagenidium giganteum isolate ARSEF 373	Eukaryota; Stramenopiles; Oomycetes; Lagenidiales; Lagenidiaceae; Lagenidium	126261093	124278137	122025000	110180000	123374891	86562000	107440000	99.2732	70.9379	97.5132
Arabidopsis thaliana	Eukaryota; Viridiplantae; Streptophyta; Streptophytina; Embryophyta; Tracheophyta; Euphyllophyta; Spermatophyta; Magnoliophyta; Mesangiospermae; eudicotyledons; Gunneridae; Pentapetalae; rosids; malvids; Brassicales; Brassicaceae; Camelineae; Arabidopsis	119667750	119667750	119658000	119580000	119667750	115944000	119280000	100	96.8962	99.7491
Giardia lamblia ATCC 50803	Eukaryota; Fornicata; Diplomonadida; Hexamitidae; Giardiinae; Giardia	11213615	11136878	11100000	10880000	11136878	9393000	10840000	100	84.6216	99.6324
Monosiga brevicollis	Eukaryota; Opisthokonta; Choanoflagellida; Craspedida; Salpingoecidae; Monosiga	41709928	41588370	41385000	40300000	41413254	38118000	39820000	99.5789	92.1058	98.8089
Naegleria gruberi	Eukaryota; Heterolobosea; Schizopyrenida; Vahlkampfiidae; Naegleria	40964085	40375095	39810000	36880000	39951125	34800000	34660000	98.9499	87.4152	93.9805
Cyanidioschyzon merolae	Eukaryota; Rhodophyta; Bangiophyceae; Cyanidiales; Cyanidiaceae; Cyanidioschyzon	16546747	16546747	16512000	16340000	16546747	15774000	16340000	100	95.5305	100
Thecamonas trahens	Eukaryota; Apusozoa; Apusomonadidae; Thecamonas	28680627	28669596	28488000	27480000	28607511	27237000	27420000	99.7834	95.6087	99.7817
Aureococcus anophagefferens	Eukaryota; Stramenopiles; Pelagophyceae; Pelagomonadales; Aureococcus	56660572	55965149	55110000	50720000	54400249	36177000	47360000	97.2038	65.6451	93.3754
Trichomonas vaginalis	Eukaryota; Parabasalia; Trichomonadida; Trichomonadidae; Trichomonas	176420065	106656600	102279000	81240000	106096809	92526000	80860000	99.4751	90.4643	99.5323
Guillardia theta	Eukaryota; Cryptophyta; Pyrenomonadales; Geminigeraceae; Guillardia	87145349	87033502	86169000	81760000	86822893	79167000	81440000	99.758	91.8741	99.6086
Chondrus crispus	Eukaryota; Rhodophyta; Florideophyceae; Rhodymeniophycidae; Gigartinales; Gigartinaceae; Chondrus	104980420	104959928	103641000	96620000	104367476	96681000	96260000	99.4355	93.2845	99.6274
Fonticula alba	Eukaryota; Opisthokonta; Nucleariidae and Fonticula group; Fonticula	31296464	31138882	30981000	30240000	30746663	23256000	28700000	98.7404	75.0654	94.9074
Prokaryotes
Fusobacterium sp. oral taxon 370	Bacteria; Fusobacteria; Fusobacteriia; Fusobacteriales; Fusobacteriaceae; Fusobacterium	2093299	2038834	1911000	1180000	41810	171000	40000	97.9493	91.0518	96.6102
Candidatus Aenigmarchaeum subterraneum SCGC AAA011-O16	Archaea; DPANN group; Candidatus Aenigmarchaeota; Candidatus Aenigmarchaeum; Candidatus Aenigmarchaeum subterraneum	428886	428886	399000	300000	237197	204000	160000	44.6946	48.8722	46.6667
Geovibrio sp. L21-Ace-BES	Bacteria; Deferribacteres; Deferribacteres; Deferribacterales; Deferribacteraceae; Geovibrio	2971658	2969191	2967000	2940000	0	90000	80000	100	96.9666	97.2789
Fusobacterium sp. CAG:649	Bacteria; Fusobacteria; Fusobacteriia; Fusobacteriales; Fusobacteriaceae; Fusobacterium; environmental samples	2159799	2093739	1938000	1100000	0	123000	0	100	93.6533	100
Fusobacterium sp. CAG:815	Bacteria; Fusobacteria; Fusobacteriia; Fusobacteriales; Fusobacteriaceae; Fusobacterium; environmental samples	1839154	1837205	1803000	1540000	0	402000	180000	100	77.7038	88.3117
Fusobacterium sp. CAG:439	Bacteria; Fusobacteria; Fusobacteriia; Fusobacteriales; Fusobacteriaceae; Fusobacterium; environmental samples	2185897	2154017	2067000	1440000	0	84000	20000	100	95.9361	98.6111
Fusobacterium sp. CM21	Bacteria; Fusobacteria; Fusobacteriia; Fusobacteriales; Fusobacteriaceae; Fusobacterium	2360833	2093538	1962000	1200000	33110	108000	20000	98.4185	94.4954	98.3333
Fusobacterium sp. CM1	Bacteria; Fusobacteria; Fusobacteriia; Fusobacteriales; Fusobacteriaceae; Fusobacterium	2442599	2392575	2205000	1240000	56424	171000	20000	97.6417	92.2449	98.3871
Fusobacterium sp. OBRC1	Bacteria; Fusobacteria; Fusobacteriia; Fusobacteriales; Fusobacteriaceae; Fusobacterium	2497272	2466941	2373000	1880000	0	195000	0	100	91.7826	100
Fusobacterium sp. CM22	Bacteria; Fusobacteria; Fusobacteriia; Fusobacteriales; Fusobacteriaceae; Fusobacterium	2438137	2422969	2307000	1760000	17782	228000	20000	99.2661	90.117	98.8636
Synergistales bacterium 57_84	Bacteria; Synergistetes; Synergistia; Synergistales; unclassified Synergistales	1255134	1118277	981000	380000	5689	21000	0	99.4913	97.8593	100
Theionarchaea archaeon DG-70-1	Archaea; Euryarchaeota; Theionarchaea; unclassified Theionarchaea	4772064	4772064	4482000	2580000	558701	1413000	420000	88.2923	68.4739	83.7209
Nitrospinae bacterium RIFCSPLOWO2_12_39_15	Bacteria; Nitrospinae/Tectomicrobia group; Nitrospinae; unclassified Nitrospinae	2194295	2194295	2028000	1160000	0	18000	0	100	99.1124	100
Nitrospinae bacterium RIFCSPHIGHO2_02_39_11	Bacteria; Nitrospinae/Tectomicrobia group; Nitrospinae; unclassified Nitrospinae	1822471	1822471	1620000	720000	0	6000	0	100	99.6296	100
Fusobacterium sp. HMSC073F01	Bacteria; Fusobacteria; Fusobacteriia; Fusobacteriales; Fusobacteriaceae; Fusobacterium	3501669	3407662	3276000	2600000	18158	156000	20000	99.4671	95.2381	99.2308
Fusobacterium sp. HMSC064B12	Bacteria; Fusobacteria; Fusobacteriia; Fusobacteriales; Fusobacteriaceae; Fusobacterium	2121738	2098800	2058000	1840000	4997	180000	20000	99.7619	91.2536	98.913
Fusobacterium sp. HMSC065F01	Bacteria; Fusobacteria; Fusobacteriia; Fusobacteriales; Fusobacteriaceae; Fusobacterium	2127181	2109846	2073000	1880000	0	141000	40000	100	93.1983	97.8723
Fusobacterium sp. HMSC064B11	Bacteria; Fusobacteria; Fusobacteriia; Fusobacteriales; Fusobacteriaceae; Fusobacterium	2401628	2364745	2283000	1860000	41461	156000	0	98.2467	93.1669	100
Candidatus Pacearchaeota archaeon CG1_02_32_21	Archaea; DPANN group; Candidatus Pacearchaeota	676359	676359	624000	260000	9903	42000	20000	98.5358	93.2692	92.3077
Candidatus Geothermarchaeota archaeon JdFR-14	Archaea; TACK group; Candidatus Geothermarchaeota	1635024	1635024	1626000	1620000	0	48000	20000	100	97.048	98.7654
Fusobacterium sp. oral taxon 203	Bacteria; Fusobacteria; Fusobacteriia; Fusobacteriales; Fusobacteriaceae; Fusobacterium	2126947	2126947	2124000	2120000	0	198000	80000	100	90.678	96.2264
Candidatus Aenigmarchaeota archaeon ex4484_52	Archaea; DPANN group; Candidatus Aenigmarchaeota; unclassified Aenigmarchaeota	614182	614182	537000	160000	85340	108000	20000	86.1051	79.8883	87.5
Candidatus Pacearchaeota archaeon ex4484_26	Archaea; DPANN group; Candidatus Pacearchaeota	426904	426904	360000	80000	12119	9000	0	97.1612	97.5	100
Chrysiogenales bacterium UBA1553	Bacteria; Chrysiogenetes; Chrysiogenetes; Chrysiogenales; unclassified Chrysiogenales	2496386	2445996	2106000	440000	0	12000	0	100	99.4302	100
Caldiserica bacterium UBA4822	Bacteria; Caldiserica; unclassified Caldiserica	1003466	992483	900000	540000	548347	459000	400000	44.75	49	25.9259
Caldiserica bacterium UBA4770	Bacteria; Caldiserica; unclassified Caldiserica	1380542	1380542	1344000	1120000	0	42000	0	100	96.875	100
Candidatus Geothermarchaeota archaeon ex4572_27	Archaea; TACK group; Candidatus Geothermarchaeota	1338836	1338836	1155000	520000	0	0	0	100	100	100
Candidatus Pacearchaeota archaeon UBA284	Archaea; DPANN group; Candidatus Pacearchaeota	966772	921327	795000	200000	34907	93000	20000	96.2112	88.3019	90
Deferribacter desulfuricans SSM1	Bacteria; Deferribacteres; Deferribacteres; Deferribacterales; Deferribacteraceae; Deferribacter; Deferribacter desulfuricans	2542933	2542933	2538000	2520000	0	216000	120000	100	91.4894	95.2381
Dictyoglomus thermophilum H-6-12	Bacteria; Dictyoglomi; Dictyoglomia; Dictyoglomales; Dictyoglomaceae; Dictyoglomus; Dictyoglomus thermophilum	1959987	1959987	1959000	1940000	0	42000	0	100	97.856	100
Dictyoglomus turgidum DSM 6724	Bacteria; Dictyoglomi; Dictyoglomia; Dictyoglomales; Dictyoglomaceae; Dictyoglomus; Dictyoglomus turgidum	1855560	1855560	1854000	1840000	0	21000	0	100	98.8673	100
Denitrovibrio acetiphilus	Bacteria; Deferribacteres; Deferribacteres; Deferribacterales; Deferribacteraceae; Denitrovibrio	3222077	3222077	3222000	3220000	0	756000	460000	100	76.5363	85.7143
Aminobacterium colombiense	Bacteria; Synergistetes; Synergistia; Synergistales; Synergistaceae; Aminobacterium	1980592	1980592	1980000	1980000	0	252000	100000	100	87.2727	94.9495
Desulfurispirillum indicum S5	Bacteria; Chrysiogenetes; Chrysiogenetes; Chrysiogenales; Chrysiogenaceae; Desulfurispirillum; Desulfurispirillum indicum	2928377	2928377	2928000	2920000	0	129000	0	100	95.5943	100
Flexistipes sinusarabici	Bacteria; Deferribacteres; Deferribacteres; Deferribacterales; Deferribacteraceae; Flexistipes	2526590	2526590	2526000	2520000	0	186000	40000	100	92.6366	98.4127
Caldisericum exile AZM16c01	Bacteria; Caldiserica; Caldisericia; Caldisericales; Caldisericaceae; Caldisericum; Caldisericum exile	1558103	1558103	1557000	1540000	0	297000	120000	100	80.9249	92.2078
Nitrospina gracilis	Bacteria; Nitrospinae/Tectomicrobia group; Nitrospinae; Nitrospinia; Nitrospinales; Nitrospinaceae; Nitrospina	3077713	3072611	3072000	3060000	0	81000	0	100	97.3633	100
Leptotrichia shahii	Bacteria; Fusobacteria; Fusobacteriia; Fusobacteriales; Leptotrichiaceae; Leptotrichia	2144606	2142698	2109000	1960000	0	300000	180000	100	85.7752	90.8163
Gracilimonas tropica	Bacteria; Balneolaeota; Balneolia; Balneolales; Balneolaceae; Gracilimonas	3831242	3803597	3750000	3600000	0	90000	0	100	97.6	100
Chrysiogenes arsenatis	Bacteria; Chrysiogenetes; Chrysiogenetes; Chrysiogenales; Chrysiogenaceae; Chrysiogenes	2825161	2819482	2787000	2640000	0	96000	20000	100	96.5554	99.2424
Mucispirillum schaedleri	Bacteria; Deferribacteres; Deferribacteres; Deferribacterales; Deferribacteraceae; Mucispirillum	2332248	2317658	2307000	2220000	6803	78000	0	99.7065	96.619	100
Oceanivirga salmonicida strain AVG 2115	Bacteria; Fusobacteria; Fusobacteriia; Fusobacteriales; Leptotrichiaceae; Oceanivirga	1768580	1659407	1500000	680000	292274	333000	120000	82.3868	77.8	82.3529
Streptobacillus notomytis strain KWG2	Bacteria; Fusobacteria; Fusobacteriia; Fusobacteriales; Leptotrichiaceae; Streptobacillus	1369609	1301343	1236000	920000	18798	105000	40000	98.5555	91.5049	95.6522
Pyramidobacter sp. C12-8	Bacteria; Synergistetes; Synergistia; Synergistales; Synergistaceae; Pyramidobacter	2668344	2607284	2526000	2100000	13205	132000	0	99.4935	94.7743	100
Aliifodinibius roseus strain DSM 21986	Bacteria; Balneolaeota; Balneolia; Balneolales; Balneolaceae; Aliifodinibius	5082244	5068252	4986000	4500000	17590	153000	20000	99.6529	96.9314	99.5556
Acetomicrobium flavidum strain DSM 20664	Bacteria; Synergistetes; Synergistia; Synergistales; Synergistaceae; Acetomicrobium	2021699	2019620	2016000	2000000	0	114000	0	100	94.3452	100
