# Supplementary material for: Genome-reconstruction for eukaryotes from complex natural microbial communities
Source: HighWire-hosted journal article supplement (doi:10.1101/gr.228429.117), 2018-03-01
Supplement: Supplemental_Table_S3.xlsx [file Supplemental_Table_S3.xlsx]

## Sheet: Supplemental Table S3
Supplemental Table S3 Metabolism summary for binned genomes.
For each individual bin, the presence or absence of various metabolic pathways is summarized. Metabolic pathways included are taken from a custom set of metabolic pathway marker gene HMMs (Anantharaman et al. 2016), HMMs for CAZymes grouped by putative substrate class (Cantarel et al. 2009), lipase HMMs from the Lipase Engineering Database (Fischer and Pleiss 2003), and BLASTing against a proteas…
	CO_oxidation	Carbon Fixation			Hydrogen Metabolism		C1 Compounds				Halogenated Compounds Breakdown		Arsenic		Urea	Oxygen metabolism				tot O2	Nitrogen Matebolism							Sulfur Metabolism				Excreted Enzymes		CAZYs
Bin	CO_oxidation	CBB_Cycle-Rubisco	Reverse_TCA	Wood_Ljungdahl	Ni-Fe_Hydrogenase	FeFe hydrogenase	Methanol_oxidation	Methyl_amine_to_formaldehyde	Formaldehyde_oxidation	Formate_oxidation	Halogenated_compounds_breakdown	Perchlorate_reduction	Arsenite_oxidation	Arsenate_reduction	Urease	cytochrome_quinone_oxidase_bo-type	cytochrome_c_oxidase_caa3-type	cytochrome_c_oxidase_cbb3-type	cytochrome_quinone_oxidase_bd-type		Nitric_oxide_reduction	Nitrate_reduction	Nitrite_reduction	Nitrite_oxidation	Nitrous_oxide_reduction	NR total	N2_fixation	Sulfur_oxidation	Sulfate_reduction	thiosulfate_oxidation	Thiosulfate_disproportionation	Excreted peptidases	excreted lipases	Pectin	Cellulose	Hemicellulose	Starch	Chitin	Other Polysaccharides	Monosaccharides	Amino Sugar
CG19_WC_8_21_14_NA_150_CG_Delta_03_70_18	0	0	0	0	2	0	0	0	0	0	0	0	0	1	0	0	0	5	0	5	9	6	2	0	0	17	0	3	3	0	0	15	0	1	1	1	3	5	1	0	8
CG19_WC_8_21_14_NA_150_CG_Hydro_01_62_33	0	1	0	0	2	0	0	0	0	0	0	0	3	0	0	0	0	7	1	8	3	10	3	0	0	16	0	2	2	1	0	14	1	0	2	1	7	5	2	0	6
CG19_WC_8_21_14_NA_150_Rubellimicrobium mesophilum_70_15	0	0	0	0	0	0	2	0	3	0	0	0	0	0	3	0	4	4	0	8	3	2	3	0	0	8	0	0	1	0	0	15	3	1	5	3	10	4	1	0	23
CG19_WC_8_21_14_NA_150_Actinobacteria_76_21	0	0	0	0	0	0	0	0	3	6	2	0	0	0	3	0	0	0	0	0	0	6	1	0	0	7	0	0	0	0	0	32	2	5	23	38	45	8	11	3	28
CG19_WC_8_21_14_NA_150_fungi_01_53_20	0	0	3	0	0	0	0	0	2	0	9	0	0	0	4	1	0	0	0	1	0	0	6	0	0	6	0	2	1	0	0	72	38	13	20	65	34	6	32	1	20
CG19_WC_8_21_14_NA_150_CG_Epsilon_01_36_69	0	0	2	0	2	0	0	0	0	0	0	2	0	1	0	0	0	3	0	3	0	5	0	0	0	5	3	0	0	0	0	10	0	0	0	0	0	2	0	0	9
CG19_WC_8_21_14_NA_150_CG_Mariprof_04_55_80	0	1	0	0	1	0	0	0	0	0	0	0	0	2	0	0	0	8	0	8	3	0	1	0	0	4	0	0	0	0	0	12	0	0	2	2	6	6	1	0	9
CG19_WC_8_21_14_NA_150_Actinobacteria_72_58	0	0	0	0	0	0	0	0	1	2	0	0	0	0	1	1	0	0	0	1	0	3	1	0	0	4	0	0	0	0	0	6	1	1	2	5	13	2	0	1	13
CG19_WC_8_21_14_NA_150_Fungi_52_33	0	0	3	0	0	0	0	0	2	0	6	0	0	0	5	1	0	0	0	1	0	0	4	0	0	4	0	1	1	0	0	41	22	14	22	39	33	11	37	2	13
CG19_WC_8_21_14_NA_150_fungi_52_9	0	0	4	0	0	0	0	0	2	0	8	0	0	0	2	1	0	0	0	1	0	0	4	0	0	4	0	0	0	0	0	27	20	10	19	39	22	7	29	1	12
CG19_WC_8_21_14_NA_150_Flavobacteriia_35_8	0	0	0	0	1	0	0	0	0	0	0	0	0	1	0	1	0	3	0	4	0	3	0	0	1	4	0	0	0	0	2	26	2	0	14	7	12	5	1	1	8
CG19_WC_8_21_14_NA_150_Flavbacteriales_35_5	0	0	0	0	0	0	0	0	0	0	0	0	0	0	0	1	0	2	0	3	0	2	1	0	1	4	0	0	0	0	0	26	5	2	12	9	3	8	4	1	5
CG19_WC_8_21_14_NA_150_Altiarchaeum hamiconexum_32_41	0	0	0	3	0	0	0	0	2	0	0	0	0	0	0	0	0	0	0	0	0	3	0	0	0	3	0	0	0	0	0	1	0	1	0	0	2	0	1	0	1
CG19_WC_8_21_14_NA_150_Actinobacteria_69_19	2	0	0	0	0	0	0	0	0	0	0	0	1	0	0	0	0	0	0	0	0	0	0	0	0	0	0	0	0	0	0	2	0	1	3	6	8	1	3	0	3
CG19_WC_8_21_14_NA_150_Gallionellales_59_14	0	0	0	0	2	0	0	0	0	0	0	0	0	0	0	0	0	0	0	0	0	0	0	0	0	0	0	0	0	2	0	0	0	0	1	0	1	0	0	0	4
CG19_WC_8_21_14_NA_150_Micrococcales_70_10	0	0	0	0	0	0	0	0	0	0	1	0	0	0	0	0	0	0	0	0	0	0	0	0	0	0	0	0	0	0	0	4	0	8	7	19	23	5	1	4	6
CG19_WC_8_21_14_NA_150_Bacteroidetes_37_5	0	0	0	0	0	0	0	0	0	0	1	0	0	0	0	0	0	0	0	0	0	0	0	0	0	0	0	0	0	0	0	4	2	3	5	3	2	0	1	0	1
CG19_WC_8_21_14_NA_150_Mucilaginibacter_39_5	0	0	0	0	0	0	0	0	0	0	0	0	0	0	4	0	0	0	0	0	0	0	0	0	0	0	0	0	0	0	0	5	2	8	1	16	3	4	0	1	4
CG19_WC_8_21_14_NA_150_Kineosporiales_75_10	1	0	0	0	0	0	0	0	0	2	1	0	0	0	10	0	1	0	0	1	0	2	0	0	0	2	0	0	0	0	0	9	0	1	7	8	12	6	3	0	13
CG19_WC_8_21_14_NA_150_Bacteroidetes_42_9	0	0	0	0	0	0	0	0	0	0	1	0	0	2	0	1	0	0	0	1	0	0	0	0	1	1	0	0	0	0	0	34	11	26	30	56	11	9	8	3	17
CG19_WC_8_21_14_NA_150_Cytophagales_41_144	0	0	0	0	0	0	0	0	0	0	0	0	0	0	0	1	0	0	0	1	0	0	0	0	0	0	0	0	0	0	0	11	3	0	14	8	7	2	3	0	1
CG19_WC_8_21_14_NA_150_Cytophagales_45_26	0	0	0	0	0	0	0	0	0	0	1	0	0	0	0	1	0	0	0	1	0	0	0	0	0	0	0	0	0	0	0	18	2	5	8	23	4	3	1	0	5
CG19_WC_8_21_14_NA_150_Bacteroidetes_57_24	0	0	0	0	0	0	0	0	0	0	0	0	0	0	0	0	0	0	1	1	0	0	0	0	0	0	0	0	0	0	0	25	5	12	9	27	9	5	7	0	10
CG19_WC_8_21_14_NA_150_unknown_euk_36_21	0	0	2	0	0	0	0	0	0	0	0	0	0	0	0	1	0	0	0	1	0	0	0	0	0	0	0	0	0	0	0	38	3	8	14	40	27	161	16	1	24
CG19_WC_8_21_14_NA_150_Hymenobacter_56_17	0	0	0	0	0	0	0	0	0	0	1	0	0	0	4	1	0	0	0	1	0	0	0	0	0	0	0	0	0	0	0	34	10	13	26	32	16	10	3	0	11
CG19_WC_8_21_14_NA_150_Bacteroidetes_53_16	0	0	0	0	0	0	9	0	0	0	1	0	0	1	4	1	0	0	0	1	0	0	0	0	0	0	0	0	0	0	0	43	12	2	20	20	25	10	4	2	13
CG19_WC_8_21_14_NA_150_CG_Thiomicrospira_01_44_35	0	1	0	0	1	0	0	0	0	0	0	0	0	0	3	0	0	5	0	5	0	0	0	0	0	0	0	2	0	4	0	12	0	1	1	0	7	5	0	0	10
CG19_WC_8_21_14_NA_150_Sphingobacteriia_46_13	0	0	0	0	0	0	0	0	0	0	1	0	0	1	0	1	0	0	0	1	0	0	0	0	0	0	0	0	0	0	0	34	5	15	21	36	11	4	5	1	23
CG19_WC_8_21_14_NA_150_Bacteroidetes_36_7	0	0	0	0	0	0	2	0	0	0	1	0	0	0	0	1	0	0	0	1	0	0	0	0	0	0	0	1	0	0	0	33	9	4	20	57	22	4	6	1	24
CG19_WC_8_21_14_NA_150_Anaerolineae_58_5	1	0	0	1	0	0	0	0	0	0	0	0	0	0	0	0	1	0	0	1	0	0	0	0	0	0	0	0	0	0	0	2	0	0	1	1	0	3	0	0	1
CG19_WC_8_21_14_NA_150_Actinobacteria_72_70	0	0	0	0	0	0	0	0	0	0	0	0	0	0	0	0	0	0	2	2	0	0	0	0	0	0	0	0	0	0	0	2	0	1	1	3	1	2	0	0	3
CG19_WC_8_21_14_NA_150_Cytophagia_42_44	0	0	0	0	0	0	3	0	0	0	0	0	0	0	0	0	0	2	0	2	0	0	0	0	0	0	0	0	0	0	0	27	3	16	25	26	15	8	8	3	13
CG19_WC_8_21_14_NA_150_Modestobacter_75_159	2	0	0	0	0	0	0	0	1	2	2	0	0	0	3	1	0	0	2	3	0	2	1	0	0	3	0	0	0	0	0	13	3	5	6	5	13	5	3	1	8
CG19_WC_8_21_14_NA_150_Micrococcales_71_12	0	0	0	0	0	0	0	0	0	0	0	0	0	0	0	1	2	0	0	3	0	0	1	0	0	1	0	0	0	0	0	1	0	0	0	6	3	4	0	0	3
CG19_WC_8_21_14_NA_150_Candidatus Saccharibacteria_51_44	0	0	0	0	0	0	0	0	0	0	0	0	0	0	0	3	0	0	0	3	0	0	0	0	0	0	0	0	0	0	0	3	0	1	8	1	5	7	2	2	1
CG19_WC_8_21_14_NA_150_Rhodospirillales_72_32	7	0	0	0	0	0	0	0	0	1	1	0	0	1	0	1	1	0	1	3	0	0	0	0	0	0	0	0	0	0	0	20	8	3	8	4	15	1	2	1	17
CG19_WC_8_21_14_NA_150_Micrococcales_66_30	0	0	0	0	0	0	0	0	0	0	0	0	0	0	0	1	2	0	0	3	0	0	0	0	0	0	0	0	0	0	0	10	1	2	4	8	19	5	4	3	11
CG19_WC_8_21_14_NA_150_Candidatus_Saccharibacteria_47_15	0	0	0	0	0	0	0	0	0	0	0	0	0	0	0	3	0	0	0	3	0	0	0	0	0	0	0	0	0	0	0	2	0	1	6	9	5	2	10	0	1
CG19_WC_8_21_14_NA_150_Candidatus_Saccharibacteria_49_6	0	0	0	0	0	0	0	0	0	0	0	0	0	0	0	3	0	0	0	3	0	0	0	0	0	0	0	0	0	0	0	0	0	0	8	2	1	2	0	0	0
CG19_WC_8_21_14_NA_150_Rhodobacterales_66_9	3	0	0	0	0	0	0	0	0	0	1	0	0	0	0	0	0	4	0	4	0	3	0	0	0	3	0	1	0	0	0	8	0	0	5	0	4	1	0	0	9
CG19_WC_8_21_14_NA_150_CG_Gallio_01_55_18	0	0	0	0	0	0	0	0	0	0	0	0	0	0	0	0	0	4	0	4	0	2	0	0	0	2	0	0	0	0	0	12	0	1	1	1	3	5	0	0	6
CG19_WC_8_21_14_NA_150_Cryptophagales_47_15	0	0	0	0	0	0	0	0	0	0	1	0	0	1	0	0	0	4	0	4	1	0	0	0	1	2	0	1	0	0	0	26	7	8	0	36	6	6	2	1	13
CG19_WC_8_21_14_NA_150_Sphingomonadales_69_91	0	0	0	0	0	0	5	0	2	0	1	0	0	1	0	1	3	0	0	4	0	0	0	0	0	0	0	0	0	0	0	22	7	14	13	19	8	0	2	0	7
CG19_WC_8_21_14_NA_150_Pontibacter korlensis_47_15	0	0	0	0	0	0	4	0	0	0	0	0	0	0	0	1	0	3	0	4	0	0	0	0	0	0	0	0	0	0	0	26	5	0	16	13	15	4	1	1	8
CG19_WC_8_21_14_NA_150_Bacteroidetes_36_9	1	0	0	0	0	0	0	0	0	0	1	0	0	0	0	0	0	4	0	4	0	0	0	0	0	0	0	1	0	0	0	28	5	5	16	56	11	0	4	0	2
CG19_WC_8_21_14_NA_150_Actinobacteria_75_44	2	0	0	0	0	0	0	0	0	2	1	0	0	0	3	1	2	0	2	5	0	2	1	0	0	3	0	0	0	0	0	16	1	3	5	5	22	4	6	0	9
CG19_WC_8_21_14_NA_150_Micrococcales_71_62	0	0	0	0	0	0	0	0	0	0	1	0	0	0	0	1	2	2	0	5	0	0	0	0	0	0	0	0	0	0	0	8	1	3	10	22	22	6	4	4	16
CG19_WC_8_21_14_NA_150_Kirrobacter mercurialis_68_18	0	0	0	0	0	0	2	0	0	0	1	0	0	1	0	3	2	0	0	5	0	0	0	0	0	0	0	0	0	0	0	22	1	0	0	1	14	0	0	1	7
CG19_WC_8_21_14_NA_150_Micrococcales_71_43	0	0	0	0	0	0	0	0	0	0	1	5	0	0	0	1	2	2	2	7	0	2	0	0	0	2	0	0	0	0	0	6	0	1	7	7	19	6	6	0	9
CG19_WC_8_21_14_NA_150_Alphaproteobacteria_67_81	0	0	0	0	0	0	0	0	0	0	0	0	0	1	0	3	1	3	0	7	0	0	0	0	0	0	0	0	0	0	0	37	8	1	12	12	5	2	2	0	6
CG19_WC_8_21_14_NA_150_Sphingomonadales_67_13	0	0	0	0	0	0	0	0	2	0	0	0	0	0	0	3	4	0	0	7	0	0	0	0	0	0	0	0	0	0	0	35	10	4	19	15	8	3	6	0	10
CG19_WC_8_21_14_NA_150_Rhizobiales_62_12	1	0	0	0	0	0	3	0	1	0	0	0	0	0	3	3	2	0	2	7	0	0	0	0	0	0	0	0	0	0	0	18	2	0	6	3	21	2	2	0	27
CG19_WC_8_21_14_NA_150_Sphingomonadales_65_41	0	0	0	0	0	0	4	0	2	1	0	0	0	1	0	3	5	0	0	8	0	0	0	0	0	0	0	0	0	0	0	37	6	2	3	2	19	0	2	0	8
CG19_WC_8_21_14_NA_150_Zetaproteobacteria_59_49	0	1	0	0	1	0	0	0	0	0	0	0	0	1	0	0	0	8	1	9	0	0	0	0	0	0	3	0	0	0	0	12	1	3	1	0	7	6	0	1	5
