# Supplementary material for: Genome-reconstruction for eukaryotes from complex natural microbial communities
Source: HighWire-hosted journal article supplement (doi:10.1101/gr.228429.117), 2018-03-01
Supplement: Supplemental_Table_S4.xlsx [file Supplemental_Table_S4.xlsx]

## Sheet: Supplemental Table S4
Supplemental Table S4 Wood-Degrading CAZyme profile for WC Fungi.
CAZyme profiles for fungi binned from CG_WC with a focus on enzymes putatively involved in wood-degradation.
	WC
CAZY	WC_Fungi_A	WC_Fungi_B	WC_Fungi_C
GH3	9	8	4
GH5	5	8	6
GH6	0	0	0
GH7	0	0	0
GH10	1	1	1
GH11	0	1	1
GH12	2	4	1
GH28	5	6	4
GH61	2	5	2
GH74	1	2	4
GH43	8	9	6
CE1	11	14	12
CE16	2	1	1
CE5	3	3	1
CE8	1	1	1
CE12	0	0	2
CE15	0	0	0
